# Muscle *FOXO*-specific overexpression and endurance exercise protects skeletal muscle and heart from defects caused by a high-fat diet in young *Drosophila*

Deng-tai Wen<sup>1#</sup>, Yi-ling Chen<sup>2#</sup>, Wen-qi Hou<sup>1</sup>

<sup>1</sup>Ludong University, City Yantai 264025, Shandong Province, China.

<sup>2</sup>YICHUN UNIVERSITY, City Yichun 336000, Jiangxi Province, China.

#Corresponding author: dt.wen@foxmail.com; ling277435818@qq.com

**Abstract:** Obesity appears to significantly reduce physical activity, but it remains unclear whether this is related to obesity-induced damage to skeletal muscle (SM) and heart muscle (HM). Endurance exercise (EE) reduces obesity-induced defects in SM and HM, but its molecular mechanism is poorly understood. The results showed that the structure and function of SM and HM were impaired by a high-fat diet (HFD) and muscle-FOXO-specific RNAi (MFSR), including reduced climbing speed and climbing endurance, reduced fractional shortening of the heart, damaged myofibrils, and reduced mitochondria in HM. Besides, a HFD and MFSR increased triglyceride level and MDA level, decreased the Sirt1 and FOXO protein level, and reduced CPT1, SOD, and CAT activity level, and they down-regulated FOXO and *bmm* expression level in SM and HM. On the contrary, both muscle FOXO-specific overexpression (MFSO) and EE prevented abnormal changes of SM and HM in function, structure, or physiology caused by HFD and MFSR. Besides, EE also prevented defects of SM and HM induced by MFSR. Therefore, current findings confirmed that MFSO and EE protected SM and heart from defects caused by a HFD via enhancing FOXO-related antioxidant pathways and lipid catabolism. FOXO played a vital role in regulating HFD-induced defects in SM and HM, but FOXO was not a key regulatory gene of EE against damages in SM and HM. The mechanism was related to activity of Sirt1/FOXO/SOD, CAT pathways and lipid catabolism in SM and HM.

**Key words:** Exercise; lipid metabolism; FOXO/SOD/CAT; muscle/heart; high-fat diet

## 1 Introduction

The childhood obesity epidemic has become a serious public health problem in many countries worldwide, and it is a major public health challenge of the 21st century [1]. In North America, approximately 30% of school age-children are overweight or obese, and 15% are obese. In European countries, these figures are 20% and 5%, respectively [2]. Besides, more than 20 million children and adolescents are overweight and obese in China [3]. Obesity in both adults and children is associated with numerous comorbidities, including muscle atrophy and cardiovascular diseases, and these obesity-induced diseases are closely related to the increase of lipotoxicity of vital organs in the body [4, 5]. Moreover, obesity can lead to adverse changes in the structure and function of skeletal muscles in children. For example, obesity results in increased adipose tissue and decreased skeletal muscle mass, and the accumulation of adipose tissue in skeletal muscle is closely related to insulin resistance and type 2 diabetes in children [6, 7]. Besides, the postural balance of obese children was impaired at different stable levels, and the calf muscles of obese children were less flexible [8]. As we all know, long-term HFD and lack of physical exercise are important causes of childhood obesity, and in children and adolescents, the more obese individuals are, the more difficult it is to participate in physical exercise [9, 10]. This phenomenon may be related to the physiological changes of skeletal muscle induced by obesity, but the underlying physiological mechanism is still poorly understood.

Forkhead O transcription factor (FOXO) and FOXO-related pathways may play a critical role in the regulation of lipid metabolism in heart [11]. For instance, overexpression of *FOXO* gene in myocardial cells protects the heart from lipid accumulation and heart dysfunction induced by a HFD [12]. Besides, *brummer* (*bmm*) gene encodes a triglyceride lipase, which is involved in lipid metabolism, including regulation of lipid accumulation and triglyceride (TG) homeostasis [13]. Overexpression of *bmm* gene in heart prevents the heart from TG accumulation and heart defects induced by HFD [12]. Moreover, Sirtuin 1 (Sirt1) encodes an NAD<sup>+</sup>-dependent deacetylase that functions during euchromatic and heterochromatic gene silencing, and it plays a critical role in metabolic health by deacetylating many target proteins in numerous tissues, including heart, muscle, and adipose tissue [14-16]. Overexpression of *Sirt1* in heart prevents heart from TG accumulation, FOXO/SOD pathway inhibition, and heart

dysfunction induced by HFD or aging[17-19]. Malondialdehyde(MDA) is a product of lipid peroxidation, and this aldehyde is a highly toxic molecule and should be considered as a marker of lipotoxicity[20, 21]. Overexpression of *Sirt1* also decreases the MAD level by enhancing antioxidant capacity in aged heart[19]. Finally, physical exercise reduces lipid accumulation in skeletal muscle and the heart, and it increases their antioxidant capacity[22-26]. However, it remains unknown whether FOXO-specific expression in skeletal muscle and heart mediates exercise against defects induced by HFD in skeletal muscle and heart.

In this study, to determine whether FOXO-mediated antioxidant pathways are involved in regulating E against lipotoxicity induced by HFD in young muscle and heart, muscle or heart FOXO-specific overexpression (FSO) flies and FOXO-specific RNAi(FSR) flies were subjected to a HFD and PE intervention from day 3 and continued for 5 days, and then the function of muscle and heart, the lipid metabolic state, the antioxidant capacity, and the lipotoxicity level in both muscle and heart were measured by several methods.

## 2 Materials and methods

### 2.1 Fly stocks, diet and husbandry, and exercise training protocols

The *FOXO*-UAS-overexpression(*FOXO*-UAS-OE) flies (stock ID: 9575; FlyBase Genotype:  $y^1 w^*$ ; P{UAS-foxo.P}2) [27], the *Mhc-gal4* (stock ID: 55133; FlyBase Genotype:  $w^*$ ; P[28]2/TM3, Sb<sup>1</sup>) flies, and *tin-gal4*(stock ID: 91538; FlyBase Genotype:  $y^1 w^*$ ; P{tin-Gal4.B}2) were obtained from the Bloomington Stock Center. The *FOXO*-UAS-RNAi flies (stock ID: v106097; FlyBase Genotype: P {KK108590}VIE-260B) was obtained from the Vienna Drosophila Resource Center. “P{KK108590}VIE-260B>w1118>MHC-gal4”, “P{UAS-foxo.P}2>w1118>MHC-gal4”, P{UAS-foxo.P}2>MHC-gal4”, and “P{KK108590}VIE-260B>MHC-gal4” were represented as “FOXO-RNAi-Control(FOXO-RNAi-C)”, “FOXO-OE-Control (FOXO-OE-C)”, “FOXO-over-expression (FOXO-OE)”, and “FOXO- RNAi” respectively. All UAS and GAL4 insertions were backcrossed into the w1118 line at least 10 times.

Normal food contained 1.6% soybean powder, 2.0% yeast, 6.7% corn meal, 0.7% agar, 4.8% sucrose, 4.8% maltose, and 0.3% propionic acid. Add 15% lard to normal food to make HFD[29, 30]. Flies were housed in a 25°C incubator with 50% humidity and a 12-h light/dark cycle. Fresh food was provided every other day.

The melting point of lard was 28-48°C. In our previous studies, we found that since coconut oil had a melting point of about 23 °C, and flies tended to stick to the melted coconut oil at 25°C, which led to an unnatural death in large numbers. However, the melting point of lard was 28-48°C. Flies could eat solid lard without sticking to it, which reduced unnecessary deaths.

When constructing the exercise device, the advantage of the flies' natural negative geotaxis behavior was taken to induce upward walking[31]. Vials were rotated at the 60 rad/s. After vials each up-and-down turn, hold for 10 seconds for the flies to climb. Flies were exercised for 1.5 hours per day[32, 33]. All exercise groups flies started exercise from when they were 2-day old, and underwent a 6-day-long exercise program. All HFD flies started feeding high-diet food from when they were 2-day old, and underwent a 6-day-long high-fat diet program.

### 2.2 Climbing ability assay

The test vials for flies' climbing speed and climbing failure were the same as the vials for exercise training, and the test vials were left eight centimeters length for the flies to climb[18]. With a light box behind the vials, once flies were shaken to the bottom of the vials, a timed digital camera snapped a picture after 3 seconds. The height the fly climbs was clearly shown on the photographs. Each vial contained about 20 flies and was subjected to 5 trials.

A cohort of flies was observed during continuous stimulation by the exercise device. Flies were placed on the exercise device in vials of 20 each and made to climb until fatigued. A vial of flies was considered "fatigued" when 5 or fewer flies are able to climb higher than 2 inches for four consecutive drops. Times of removal could be plotted as a "time-to-failure" plot [31].

### 2.3 Heart function assay

Flies were anesthetized with FlyNap for 2-3 min. The head, ventral thorax, and ventral abdominal cuticle were removed by

special glass needles to expose the heart and abdomen. Dissections were done under oxygenated artificial hemolymph[34]. Artificial hemolymph was allowed to equilibrate with oxygenation for 15-20 min before filming. To get a random sampling of heart function, a single 30-s recording(AVI format) was made for each fly by using high-speed camera. The heart physiology of the flies was assessed using a AVS Video Editor analysis program that quantifies diastolic interval(DI), systolic interval(SI), heart period(HP), diastolic diameter(DD), systolic diameter(SD), and fractional shortening(FS)[35]. The sample size was 17 flies for each group.

## 2.4 MDA assay

20 flies muscle were converted to homogenates in a homogenizer filled with 1 ml PBS (pH 7.2-7.4). The homogenates were centrifuged at 4°C for 15 min with a speed of 2000 r/min. The supernatant was mixed with the reagents supplied in an MDA Assay Kit(MLBIO, Shanghai, China) and incubated at 95°C for 40 min. The absorbance of the supernatant was measured at 530 nm. All operations were according to the manufacturer's instructions. All assays were repeated three times.

## 2.5 Transmission electron microscopy of skeletal muscle and myocardium

For electron microscopic analysis, skeletal muscle and myocardium were dissected in ice-cold fixative (2.5% glutaraldehyde in 0.1 M PIPES buffer at pH 7.4). After 10 hours of fixation at 4°C, samples were washed with 0.1M PIPES, post-fixed in 1% OsO<sub>4</sub> (30 min), and stained in 2% uranyl acetate (1 hour). Samples were dehydrated in an ethanol series (50%, 70%, 100%) and embedded in epoxy. Ultrathin sections (50 nm) were cut and viewed on a Tecnai G2 Spirit Bio-TWIN electron microscope[36].

## 2.6 ELISA assay

The FOXO level, Sirt1 level, carnitine palmityl transferase -1(CPT1) level, SOD activity level, and CAT activity level were measured by ELISA assay(Insect FOXO, Sirt1, CPT1, SOD, and CAT ELISA Kits, MLBIO, Shanghai, China). 10 flies' muscles and 80 hearts were homogenized in PBS (pH 7.2-7.4). Samples were rapidly frozen with liquid nitrogen and then maintained at 2°C -8°C after melting. Homogenize the samples with grinders, and centrifugation was conducted for 20 min at 2000-3000 rpm. Then we removed the supernatant. Assay: take the blank well as zero, and read absorbance at 450 nm within 15 min of adding Stop Solution. All assays were repeated 3 times.

## 2.7 qRT-PCR

About 20 flies' muscles and 80 hearts were homogenized in Trizol. 10 µg of the total RNA was purified by organic solvent extraction from the Trizol (TRIzol, Invitrogen). The purified RNA was treated with DNase I (RNase-free, Roche) and used to produce oligo dT-primed cDNAs (SuperScript II RT, Invitrogen), which were then used as templates for quantitative real-time PCR. The rp49 gene was used as an internal reference for normalizing the quantity of total RNAs. Real-time PCR was performed with SYBR green using an ABI7300 Real time PCR Instrument (Applied Biosystems), with 3 biological replicates. Expression of the various genes was determined by the comparative CT method (ABI Prism 7700 Sequence Detection System User Bulletin #2, Applied Biosystems). Primer sequences of *dFOXO* were as follows: F: 5'-AACAACAG CAGCATCAGCAG-3'; R:5'-CTGAA CCCGAGCATTTCAGAT-3'. Primer sequences of *bmm* were as follows: F: 5'-ACTGCACATTTTCGCTTACCC-3', R: 5'-GAGAA TCCGGGTATGAAGCA-3'; Primer sequences of Rp49 were as follows: F: 5 -CTAAGCTG TCGCACAAATGG-3'; R: 5'-AACTT CTTGAATCC GGTGGG-3'.

## 2.8 Statistical analyses

Independent-sample *t* tests were used to assess differences between the each group flies. P-values for lifespan curves and climbing endurance curves were calculated by the log-rank test. Analyses were performed using the Statistical Package for the Social Sciences (SPSS) version 16.0 for Windows (SPSS Inc., Chicago, USA), with statistical significance set at P<0.05. Data are represented as means ± SEM.

### 3 Results

#### 3.1 A 6-day HFD with 15% lard induces the defects of skeletal muscle(SM) in young *w<sup>1118</sup>* wild *Drosophila*

It has been confirmed that a 5-day HFD contributes to climbing performance decline, obesity phenotypes, and heart defects in flies, and this HFD is added to a normal diet with 30% coconut oil[17, 37]. Since coconut oil had a melting point of about 23 °C, and flies tended to stick to the melted coconut oil at 25°C, which led to an unnatural death in large numbers. To avoid large numbers of accidental fly deaths, we substituted 15% lard for 30% coconut oil for a HFD in this study. Increasing evidence confirms that the climbing speed and climbing endurance of flies can reflect its climbing performance[38].

The results showed that both a 2-day HFD, a 4-day HFD, and a 6-day HFD significantly decreased the climbing height(CH) in *w<sup>1118</sup>* wild *Drosophila*( $P<0.01$ ,  $P<0.01$ ,  $P<0.01$ ) (Fig.1-A and B), and a 6-day HFD significantly decreased the time to fatigue(TTF) in *w<sup>1118</sup>* wild *Drosophila* ( $P<0.01$ )(Fig.2-A). Besides, a 6-day HFD significantly increased the body weight, body TG level, and muscle TG level( $P<0.05$ ,  $P<0.01$ ,  $P<0.01$ ) (Fig.2-B, E, G, and I), and it significantly reduced the body carnitine palmitoyl transferase-1(CPT1) in *w<sup>1118</sup>* wild *Drosophila* ( $P<0.01$ ) (Fig.2-F). These results suggested that a 6-day HFD with 15% lard impaired the climbing performance, contributed to obesity, and induced the reduction of key enzymes of lipid catabolism in young *w<sup>1118</sup>* wild *Drosophila*.

To further investigate the changes in physiology induced by this HFD in SM, SM-related genes and proteins were detected by high-throughput sequencing, RT-PCR, and ELISA in young *w<sup>1118</sup>* wild *Drosophila*[12, 37, 39, 40]. The high-throughput sequencing and RT-PCR results showed that the skeletal muscle *FOXO* expression was significantly down-regulated by a 6-day HFD( $P<0.01$ ) (Fig.3-A to F). Besides, the results showed that the skeletal muscle CPT1 protein activity level and *bmm* expression level were significantly down-regulated by a 6-day HFD( $P<0.01$ ,  $P<0.01$ ) (Fig.2-H, Fig.3-F). Moreover, a 6-day HFD significantly reduced the skeletal muscle FOXO protein level, Sirt1 protein level, SOD activity level, and CAT activity level( $P<0.01$ ,  $P<0.01$ ,  $P<0.01$ ,  $P<0.05$ ) (Fig.4-A to E), but it increased significantly skeletal muscle MDA level in young *w<sup>1118</sup>* wild *Drosophila*( $P<0.01$ ) (Fig.4-F). In addition, the transmission electron microscope images displayed that a HFD induced myofibrillary damage (Fig.5).

These results suggested that a 6-day HFD with 15% lard induced abnormal changes in lipid metabolism and antioxidant capacity, including the inhibition of CPT1 activity and *bmm* expression and down-regulation of Sirt1/FOXO/SOD, CAT pathways, thus increasing the lipid accumulation in SM.

*Drosophila* has emerged as an important model to study the effects of HFD on metabolism, heart function, behavior, and ageing[39, 41-43]. For example, a 5-day HFD increases TG levels and disrupts insulin/glucose homeostasis in flies, which is similar to mammalian responses[44, 45], and this is consistent with our findings. It has been reported that the cardiac FOXO gene plays a key role in the regulation of lipid metabolism in the adult *Drosophila* heart[12], but few have reported the role of FOXO gene in the regulation of lipid metabolism in SM. The above experimental results indicate that FOXO gene and its related pathways may also be involved in the regulation of lipid metabolism in SM, but the role of SM-FOXO gene in regulating skeletal muscle lipid metabolism still needs to be further confirmed.

#### 3.2 Skeletal muscle(SM) FOXO gene plays a key role in regulating skeletal muscle function and lipid metabolism

To confirm that the role of FOXO gene in regulating lipid metabolism in SM, muscle FOXO-specific overexpression(MFSO) and RNAi(MFSR) were built by UAS/MHC-Gal4 system. The results showed that MFSR significantly decreased the CH at age of 6-day old and 8-day old *Drosophila*( $P<0.05$ ,  $P<0.01$ ) (Fig.1-C and D), and it also significantly decreased TTF at the age of 8-day old *Drosophila*( $P<0.05$ ) (Fig.2-B). Besides, the results showed that MFSR significantly increased body weight( $P<0.01$ ) (Fig.2-D), but it did not induce a significant increase in whole-body TG( $P>0.05$ ) (Fig.2-E), and it also did not significantly decrease body CPT1 activity( $P>0.05$ ) (Fig.2-F). Moreover, the results showed MFSR significantly increased the skeletal muscle TG level( $P<0.05$ ) (Fig.2-G) and decreased CPT1 activity level( $P<0.01$ ) (Fig.2-H), FOXO gene expression and protein level( $P<0.01$ ,  $P<0.01$ ) (Fig.3-F, Fig.4-A), *bmm* gene expression level( $P<0.01$ ) (Fig.3-F), Sirt1 protein level( $P<0.01$ ) (Fig.4-B), and SOD activity level and CAT activity level( $P<0.01$ ,  $P<0.01$ ) (Fig.4-C to E), and MFSR significantly

increased the skeletal muscle MDA level ( $P < 0.01$ ) (Fig.4-F). In addition, the transmission electron microscope images displayed that a MFSR impaired myofibrillary of skeletal muscle (Fig.5).

These results suggested that although FOXO knockdown in SM did not induce dysregulation of systemic lipid metabolism, muscle FOXO-specific knockdown in SM can lead to decrease in its function and abnormal lipid metabolism, including impaired climbing ability, increased lipid accumulation, attenuated lipid catabolism and antioxidant, which is similar to the effect of a HFD on SM. These results also suggested that FOXO gene played an important role in regulating lipid metabolism and antioxidant in SM, but whether this role is critical remains to be confirmed.

To further confirm whether FOXO gene played a key role in the regulation of lipid metabolism in SM, SM-FOXO gene was specifically overexpressed and the transgenic flies were subjected to a HFD intervention. The results showed that MFSO significantly increased the CH of 4-day-old, 6-day-old, and 8-day-old flies ( $P < 0.01$ ,  $P < 0.05$ ,  $P < 0.05$ ) (Fig.1-E and F), and it also significantly increased TTF of 8-day-old *Drosophila* ( $P < 0.05$ ) (Fig.2-C). Besides, the results showed that MFSO significantly increased body weight ( $P < 0.05$ ) (Fig.2-D) and whole-body TG level ( $P > 0.05$ ) (Fig.2-E), and it also significantly increased body CPT1 activity ( $P < 0.01$ ) (Fig.2-F). Moreover, the results showed MFSO significantly decreased the skeletal muscle TG level ( $P < 0.05$ ) (Fig.2-G) and increased CPT1 activity level ( $P < 0.01$ ) (Fig.2-H), FOXO gene expression and protein level ( $P < 0.01$ ,  $P < 0.01$ ) (Fig.3-F, Fig.4-A), bmm gene expression level ( $P < 0.01$ ) (Fig.3-F), Sirt1 protein level ( $P < 0.01$ ) (Fig.4-B), and SOD activity level and CAT activity level ( $P < 0.01$ ,  $P < 0.01$ ) (Fig.4-C to E), and MFSO significantly decreased the skeletal muscle MDA level ( $P < 0.01$ ) (Fig.4-F).

However, in MFSO transgenic flies, a 6-day HFD could not significantly change CH ( $P > 0.05$ ) (Fig.1-E and F), TTF ( $P > 0.05$ ) (Fig.2-C), skeletal muscle TG level ( $P > 0.05$ ) (Fig.2-G), CPT1 activity level ( $P > 0.05$ ) (Fig.2-H), FOXO gene expression and protein level ( $P > 0.05$ ,  $P > 0.05$ ) (Fig.3-F, Fig.4-A), bmm gene expression level ( $P > 0.05$ ) (Fig.3-F), Sirt1 protein level ( $P > 0.05$ ) (Fig.4-B), and SOD activity level and CAT activity level ( $P > 0.05$ ,  $P > 0.05$ ) (Fig.4-C to E), and skeletal muscle MDA level ( $P > 0.05$ ) (Fig.4-F). In addition, the transmission electron microscope images displayed that a MFSO protected myofibrillary of skeletal muscle from damage caused by a HFD (Fig.5).

These results suggested that FOXO-specific overexpression in skeletal muscle can enhance skeletal muscle function and lipid metabolism, including enhanced climbing ability and lipid catabolism, decreased lipid accumulation, and activated Sirt1/FOXO/SOD, CAT pathways related to antioxidant. In addition, the results showed that in MFSO transgenic flies, a 6-day HFD could not significantly reduce climbing ability, attenuate lipid catabolism, and inhibit Sirt1/FOXO/SOD, CAT pathways in SM. Therefore, the present results confirmed that in skeletal muscle, FOXO gene played a key role in preventing damages induced by a HFD, and its mechanism may be related to regulation of lipid catabolism and Sirt1/FOXO/SOD, CAT pathways related to antioxidant.

### 3.3 Endurance exercise (EE) prevented SM from damages induced by a HFD or MFSR in young *Drosophila*

Exercise training improves the climbing performance in adult flies, and it delays age-related climbing performance decline in aging flies [46-49]. Increasing evidence confirms that a 5-day EE reduces lipid accumulation in SM and HM, and it increases their antioxidant capacity in flies [22-26], but the molecular pathways through which EE regulates skeletal muscle lipid metabolism are poorly understood.

In this study, the results suggested that a 2-day EE, 4-day EE, and 6-day EE significantly increased CH of in  $w^{1118}$ -HFD flies ( $P < 0.05$ ,  $P < 0.01$ ,  $P < 0.01$ ) (Fig.1-A and B), and it also significantly increased TTF of 8-day-old HFD *Drosophila* ( $P < 0.05$ ) (Fig.2-A). Besides, the results showed that in  $w^{1118}$ -HFD flies, a 6-day EE significantly increased body weight ( $P < 0.05$ ) (Fig.2-D), it significantly decreased whole-body TG level ( $P < 0.01$ ) (Fig.2-E), and it also significantly increased body CPT1 activity ( $P < 0.01$ ) (Fig.2-F). Moreover, the results showed that in  $w^{1118}$ -HFD flies, a 6-day EE significantly decreased the skeletal muscle TG level ( $P < 0.05$ ) (Fig.2-G), and it significantly increased CPT1 activity level ( $P < 0.01$ ) (Fig.2-H), FOXO gene expression and protein level ( $P < 0.01$ ,  $P < 0.01$ ) (Fig.3-F, Fig.4-A), bmm gene expression level ( $P < 0.01$ ) (Fig.3-F), Sirt1 protein level ( $P < 0.01$ ) (Fig.4-B), and SOD activity level and CAT activity level ( $P < 0.01$ ,  $P < 0.01$ ) (Fig.4-C to E), and a 6-day EE significantly decreased the skeletal



mucle MDA level( $P<0.01$ ) (Fig.4-F). In addition, the transmission electron microscope images displayed that EE protected myofibrillary of SM from damage caused by a HFD (Fig.5). These results suggested that EE could prevent SM-defects induced by a HFD through activating muscle lipid catabolism and Sirt1/FOXO/SOD, CAT pathways, but the role of SM-FOXO gene in this process remains unclear.

To confirm whether the FOXO gene plays a critical role in EE resistance to damages caused by lipid accumulation in SM, SM-FOXO-RNAi flies were subjected to EE intervention. The results showed that in SM-FOXO-RNAi flies, a 4-day EE and a 6-day EE significantly increased CH( $P<0.05$ ,  $P<0.01$ )(Fig.1-C and D), and it also significantly increased TTF ( $P<0.05$ ) (Fig.2-B). Besides, the results showed that in SM-FOXO-RNAi flies, a 6-day EE significantly decreased body weight ( $P<0.05$ ) (Fig.2-D), it significantly decreased whole-body TG level( $P<0.01$ ) (Fig.2-E), and it significantly increased body CPT1 activity( $P<0.01$ ) (Fig.2-F). Moreover, the results showed that in skeletal muscle FOXO-RNAi flies, a 6-day EE significantly decreased the skeletal muscle TG level( $P<0.05$ ) (Fig.2-G), and it significantly increased CPT1 activity level( $P<0.01$ ) (Fig.2-H), bmm gene expression level( $P<0.01$ ) (Fig.3-F), Sirt1 protein level( $P<0.01$ ) (Fig.4-B), and SOD activity level and CAT activity level( $P<0.01$ ,  $P<0.01$ ) (Fig.4-C to E), and a 6-day EE significantly decreased the skeletal muscle MDA level( $P<0.01$ ) (Fig.4-F). However, in SM-FOXO-RNAi flies, a 6-day EE did not significantly change FOXO gene expression and protein level( $P>0.05$ ,  $P>0.05$ ) (Fig.3-F, Fig.4-A). In addition, the transmission electron microscope images displayed that a MFSO protected myofibrillary of skeletal muscle from damage caused by skeletal muscle FOXO-RNAi (Fig.5).

These results suggested that EE could prevent defects induced by SM-FOXO-RNAi through activating muscle lipid catabolism and Sirt1/FOXO/SOD, CAT pathways, and FOXO gene was not a key gene for EE against damages induced by lipid accumulation in SM.

### **3.4 EE and MFSO prevented heart dysfunction induced by a HFD(with 15% lard) in young male *Drosophila***

It has been confirmed that cardiac *FOXO* gene play a vital role in regulating cardiac lipid metabolism and heart function, cardiac *FOXO* overexpression protects heart function from a HFD(with 30% coconut oil)-induced damage in adult drosophila flies, and cardiac *FOXO* RNAi can induce cardiac dysfunction, and this is similar to HFD(with 30% coconut oil)-induced cardiac dysfunction[12, 50][12, 51, 52]. However, it remains unclear whether HFD(with 15% lard) could also cause cardiac dysfunction, and the role of FOXO gene in EE against lipid metabolism abnormalities and cardiac dysfunction in heart still remains unclear.

The results showed that at 8 days of age, the diastolic interval(DI) and heart period(HP) of w1118-HFD flies was significantly shorter than that of w1118 flies( $P<0.05$ ), and the DI and HP of w1118-HFD+E flies was significantly longer than that of w1118-HFD flies( $P<0.05$ ). Besides, the DI and HP of FOXO-RNAi flies was significantly shorter than that of FOXO-RNAi-C flies( $P<0.05$ ), and the DI and HP of FOXO-RNAi+E flies was significantly longer than that of FOXO-RNAi flies( $P<0.05$ ). Moreover, the DI and HP of FOXO-OE flies was significantly longer than that of FOXO-OE-C flies( $P<0.05$ ), but there was no significant difference in DI and HP between FOXO-OE flies and FOXO-OE+HFD flies( $P>0.05$ ). However, the effect of EE, HFD, FSO, and FSR on systolic interval was not significant ( $P>0.05$ ). (Fig.6-A to C)

The results showed that at 8 days of age, the diastolic diameter(DD) of w1118-HFD flies was significantly higher than that of w1118 flies( $P<0.05$ ), and the DD of w1118-HFD+E flies was significantly lower than that of w1118-HFD flies( $P<0.05$ ). Besides, the DD of FOXO-RNAi flies was significantly higher than that of FOXO-RNAi-C flies( $P<0.05$ ), but there was no significant difference in DD between FOXO-RNAi flies and FOXO-RNAi+E flies( $P>0.05$ ). Moreover, there was no significant difference in DD between FOXO-OE flies and FOXO-OE+HFD flies( $P>0.05$ ), and there was no significant difference in DD between FOXO-OE flies and FOXO-RNAi-C flies( $P>0.05$ ). (Fig.6-D and G)

The results showed that at 8 days of age, the systolic diameter(SD) of w1118-HFD flies was significantly higher than that of w1118 flies( $P<0.05$ ), and the SD of w1118-HFD+E flies was significantly lower than that of w1118-HFD flies( $P<0.05$ ). Besides, the SD of FOXO-RNAi flies was significantly higher than that of FOXO-RNAi-C flies( $P<0.05$ ), but there was no significant difference in SD between FOXO-RNAi flies and FOXO-RNAi+E flies( $P>0.05$ ). Moreover, the SD of FOXO-OE flies was significantly lower than that of FOXO-OE-C flies( $P<0.01$ ), and there was no significant difference in SD between FOXO-OE flies

and FOXO-RNAi-UAS flies( $P>0.05$ ). (Fig.6-E and G)

The results showed that at 8 days of age, the fractional shortening(FS) of w<sup>1118</sup>-HFD flies was significantly lower than that of w<sup>1118</sup> flies( $P<0.05$ ), and the FS of w<sup>1118</sup>-HFD+E flies was significantly higher than that of w<sup>1118</sup>-HFD flies( $P<0.05$ ). Besides, the FS of FOXO-RNAi flies was significantly lower than that of FOXO-RNAi-C flies( $P<0.05$ ), and FS of FOXO-RNAi+E flies was significantly higher than that of FOXO-RNAi flies( $P<0.05$ ). Moreover, the FS of FOXO-OE flies was significantly higher than that of FOXO-OE-C flies( $P<0.05$ ), but there was no significant difference in FS between FOXO-OE flies and FOXO-RNAi-UAS flies( $P>0.05$ ). (Fig.6-F)

The results showed that at 8 days of age, the heart TG level of w<sup>1118</sup>-HFD flies was significantly higher than that of w<sup>1118</sup> flies( $P<0.01$ ), and the heart TG level of w<sup>1118</sup>-HFD+E flies was significantly lower than that of w<sup>1118</sup>-HFD flies( $P<0.05$ ). Besides, the heart TG level of FOXO-RNAi flies was significantly higher than that of FOXO-RNAi-C flies( $P<0.05$ ), and the heart TG level of FOXO-RNAi+E flies was significantly lower than that of FOXO-RNAi flies( $P<0.01$ ). Moreover, but there was no significant difference in heart TG level between FOXO-OE flies and FOXO-OE-C flies( $P>0.05$ ), and there was no significant difference in the heart TG level between FOXO-OE flies and FOXO-OE+HFD flies( $P>0.05$ ) (Fig.7-A and B).

The proteins and activity of proteins showed that at 8 days of age, the heart FOXO protein level, Sirt1 protein level, SOD and CAT activity level of w<sup>1118</sup>-HFD flies were significantly lower than that of w<sup>1118</sup> flies( $P<0.01$ ), and the heart FOXO protein level, Sirt1 protein level, SOD and CAT activity level of w<sup>1118</sup>-HFD+E flies were significantly higher than that of w<sup>1118</sup>-HFD flies( $P<0.01$ ). Besides, the heart FOXO protein level, Sirt1 protein level, SOD and CAT activity level of FOXO-RNAi flies were significantly lower than that of FOXO-RNAi-C flies( $P<0.01$ ), and the heart Sirt1 protein level, SOD and CAT activity level of FOXO-RNAi+E flies was significantly higher than that of FOXO-RNAi flies( $P<0.01$ ), but there was no significant difference in the heart FOXO protein level between FOXO-RNAi flies and FOXO-RNAi+E flies( $P>0.05$ ). Moreover, the heart FOXO protein level, Sirt1 protein level, SOD and CAT activity level of FOXO-OE flies were significantly higher than that of FOXO-OE-C flies( $P<0.01$ ), but there was no significant difference in the heart FOXO protein level, Sirt1 protein level, SOD and CAT activity level between FOXO-OE flies and FOXO-OE+HFD flies( $P>0.05$ ) (Fig.7-C to F).

The transmission electron microscope images displayed that a HFD and FSR disrupted the alignment of myofibrils and reduced the number of mitochondria, but EE protected them from damage induced by induced by HFD and FSR. FSO protected the alignment of myofibrils and the number of mitochondria from damage induced by HFD(Fig.8).

These results suggested that a HFD(with 15% lard) and MFSR induced cardiac defects, including weakening cardiac ability to contractility, increasing lipid accumulation and oxidative damage, inhibiting antioxidant capacity, and damaging myofibrils and mitochondria. However, EE and MFSR could prevent heart defects caused by a HFD(with 15% lard), and EE could prevent heart defects caused by MFSR. Therefore, cardiac FOXO gene played a key role in regulating HFD-induced cardiac dysfunction, which was consistent with the results of previous study[12], but FOXO was not a key gene for EE against heart defects caused a HFD in young flies, and its mechanism may be related to regulation of lipid catabolism and Sirt1/FOXO/SOD, CAT pathways related to antioxidant.

#### 4 Discussion

*Drosophila* has emerged as an important model to study the effects of a HFD on metabolism, heart function, behavior, and ageing[39, 41-43]. For example, a HFD increases TG levels and disrupts insulin/glucose homeostasis in flies, which is similar to mammalian responses[44, 45], and it also causes cardiac TG accumulation, reduced heart contractility, conduction blocks, and severe structural pathologies, reminiscent of diabetic cardiomyopathies. Remarkably, these metabolic and cardiotoxic phenotypes induced by a HFD can be blocked by inhibiting insulin-TOR signaling[12, 17, 40]. Moreover, reducing insulin-TOR activity by expressing FOXO or *bmm* in myocardium alleviates cardiac TG accumulation and heart dysfunction induced by a HFD. Cardiac dysfunction induced by a HFD persists for two subsequent generations in *Drosophila*, and this is associated with reduced expression of *bmm* and *PGC-1 $\alpha$* [12, 53, 54]. Cardiac Nmnat/NAD<sup>+</sup>/SIR2 pathways are important antagonists of HFD-induced lipotoxic cardiomyopathy[55]. Endurance exercise(EE) could improve lipotoxic cardiomyopathy induced by a HFD or cardiac

*dSir2* knockdown by activating NAD<sup>+</sup>/dSIR2/*PGC-1α* pathway in old *Drosophila*[17]. EE also improves exercise ability, cardiac contraction, and *dSir2* expression, and it reduces TG levels, heart fibrillation, and mortality in both HFD and aging flies[37, 56]. These evidences suggest that FOXO pathways play a key role in the regulation of lipid metabolism in the heart of flies, but it remains unclear whether FOXO pathways mediate lipid metabolism regulation in skeletal muscle in young flies.

In this study, young male fruit flies were given a HFD intervention starting at 3 days of age for 6 consecutive days. The results showed that after feeding a HFD, the body TG level and the TG level of SM and HM were increased, and the *bmm* expression and CPT1 activity were decreased, which indicated that lipid homeostasis had been disrupted. Besides, the results of climbing speed and climbing endurance suggested that a HFD impaired the exercise performance in young male flies, and the results of heart period and fractional shortening showed that a HFD impaired the heart function in young male flies. Further research found that a HFD reduced lipid catabolism and down-regulated Sirt1/FOXO/SOD, CAT pathways in skeletal muscle and heart of young male *Drosophila*, and it increased MDA level and damaged myofibrils in skeletal muscle and heart. These results indicated that the structure and function of SM and heart were impaired by a HFD, which may be related to the down-regulation of muscle FOXO/antioxidant pathways and lipid catabolic pathway.

In order to determine the regulatory function of *FOXO* gene on lipid metabolism in skeletal muscle and heart, *FOXO* gene was specifically overexpressed and knocked down in *Drosophila* SM and HM. The results showed that the structure and function of SM and heart were impaired by MFSR, and MFSR also down regulated muscle FOXO/antioxidant pathways and lipid catabolic pathway in skeletal muscle and heart of young male *Drosophila*, and it increased MDA level and damaged myofibrils in skeletal muscle and heart. These changes were similar to the skeletal muscle damages induced by a HFD. In contrast, muscle FOXO-specific overexpression(MFSO) not only reduced lipid accumulation in skeletal muscle and heart and improved exercise performance and heart function, but also effectively prevented HFD-induced defects in skeletal muscle and heart. MFSO up regulated FOXO/antioxidant pathways and lipid catabolic pathway in skeletal muscle and heart of young male *Drosophila*. Therefore, these results confirmed that FOXO played a vital role in regulating lipid metabolism in skeletal muscle and heart, and the mechanism is that FOXO in skeletal muscle and heart participated in the regulation of FOXO/antioxidant pathways and lipid catabolic pathway.

FOXO is a highly conserved transcription factor that plays an important role in cellular homeostasis. FOXO protein is also involved in the regulation of cell cycle, apoptosis and muscle regeneration[57, 58]. Silent information regulator 1 (Sirt1), a homolog of Sir2, appears to control the cellular response to stress by modulating FOXO, which acts as a sensor of insulin signaling pathways and a regulator of biological lifespan[59-61]. Sirt1 is an NAD<sup>+</sup> dependent deacetylase and a commonly expressed protein that regulates gene expression through histone deacetylation, and it plays a complex role in the pathology, progression and treatment of a variety of diseases[62]. Sirt1 plays a key role in FOXO function through NADH-dependent deacetylation in oxidative stress response, which may contribute to stress resistance and longevity of cells[63]. In oxidative stress response, FOXO protein is translocated from the cytoplasm to the nucleus, promoting the expression of its target genes encoding antioxidant enzymes such as MnSOD, CAT, and glutathione peroxidase (GPX), and thus enhancing the antioxidant capacity of cells[64]. Therefore, Sirt1/FOXO/antioxidant pathways are involved in the regulation of lipid metabolism by regulating MDA and oxidative stress.

Excess lipids cannot be packaged into lipid droplets, resulting in a chronic rise in circulating fatty acids, which can reach toxic levels in non-adipose tissue. The deleterious effects of lipid accumulation in non-adipose tissue such as heart and skeletal muscle are known as lipotoxicity[5, 65-68]. Malondialdehyde (MDA) is the best product of lipid peroxidation, and it is produced from polyunsaturated fatty acids through chemical reactions and enzyme-catalyzed reactions. MDA is the most commonly measured biomarker of oxidative stress and lipid peroxidation[21, 69-71]. Moreover, The *brummer* (*bmm*) gene encodes the lipid storage droplet associated TG lipase Brummer, which is a homolog of human adipocyte triglyceride lipase (ATGL)[13, 72]. Lack of food or chronic overexpression of *bmm* depletes organismal fat stores in vivo, and loss of *bmm* activity causes obesity in flies[73]. Carnitine palmitoyl transferase I(CPT1) is the key enzyme in the carnitine dependent transport of long chain fatty acids across the mitochondrial inner membrane, and its deficiency results in a decrease rate of fatty acids beta-oxidation with decreased



energy production[74-76]. FOXO gene overexpression limited the accumulation of lipids and increased *bmm* expression in heart[12]. Therefore, the regulation of FOXO on lipid metabolism is also related to the upstream regulation of *bmm*-related and CPT1-related lipid catabolic pathway.

Exercise is one of the best strategies to treat and prevent obesity[77-80]. There are many differences in long-term metabolic adaptations between endurance trained athletes and obese insulin-resistant volunteers, and examining the effects of chronic exercise training in diabetes-prone populations may reveal more interesting information about the role of lipotoxicity in the development of insulin resistance[65]. There is evidence that exercise can effectively counter lipotoxicity in skeletal and cardiac muscles[40, 67, 68]. On the one hand, exercise can increase fat consumption as energy, which can reduce fat accumulation and prevent obesity. Exercise, on the other hand, increases the antioxidant capacity of skeletal muscles and the heart, which reduces oxidative stress damage in skeletal muscle and heart[24, 81]. However, the role of FOXO gene in EE against lipid metabolism abnormalities and defects in heart and SM still remains unclear.

In this research, the results showed that in HFD flies, physical exercise decreased the body TG level, skeletal muscle TG level, and cardiac TG level, and it upregulated the *bmm* expression and CPT1 activity of skeletal muscle, which indicated that physical exercise protected lipid homeostasis from being disrupted by HFD. Moreover, the results of climbing speed and climbing endurance suggested that EE also protected exercise performance, heart period, and fractional shortening from being impaired induced by HFD in young male flies. Further research showed that physical exercise prevented the Sirt1/FOXO/SOD, CAT pathways from being down regulated by a HFD in young male, and it also prevented MDA level from being increased by a HFD, and EE protected myofibrils from being damaged by HFD in SM and heart. These results indicated that EE protected the structure and function from damages caused by a HFD in SM and heart, which may be related to the up-regulation of muscle lipid catabolic pathway.

Moreover, to determine whether FOXO played a key regulatory role in mediating EE resistance to defects induced by lipid accumulation, MFSR flies were also given an exercise intervention. The results showed that although EE did not upregulate FOXO gene expression and FOXO protein levels, it still upregulated lipid catabolic pathway and SOD, CAT activity, suggesting that FOXO was not a key regulatory gene of EE against lipid toxicity in SM and heart. Therefore, these results confirmed that EE prevented SM and heart from defects by up regulating Sirt1/antioxidant pathways and lipid catabolic pathway, but FOXO was not a key regulatory gene of EE against defects caused by a HFD in SM and heart.

In aged flies, cardiac *dSir2* gene knockdown induces lipotoxic cardiomyopathy via inhibiting cardiac NAD<sup>+</sup>/dSIR2/*PGC-1α* pathway in old flies. A HFD aggravates lipotoxic cardiomyopathy induced by cardiac *dSir2* knockdown via inhibiting cardiac NAD<sup>+</sup>/dSIR2/*PGC-1α* pathway in untrained flies[55]. EE improve lipotoxic cardiomyopathy induced by cardiac *dSir2* knockdown, and it could prevent further deterioration of lipotoxic cardiomyopathy induced by a HFD in cardiac *dSir2* knockdown flies[17]. Endurance exercise activated the cardiac Nmnat/NAD<sup>+</sup>/SIR2/FOXO pathway and the Nmnat/NAD<sup>+</sup>/SIR2/*PGC-1α* pathway, including up-regulating cardiac Nmnat, SIR2, FOXO and *PGC-1α* expression, superoxide dismutase (SOD) activity and NAD<sup>+</sup> levels, and it prevented HFD-induced or cardiac Nmnat knockdown-induced cardiac lipid accumulation, malondialdehyde (MDA) content and fibrillation increase, and fractional shortening decrease[55].

## 5 Conclusion

Current findings confirmed that MFSO and EE protected SM and heart from defects caused by a HFD via enhancing FOXO-related antioxidant pathways and lipid catabolism. FOXO played a vital role in regulating HFD-induced defects in SM and HM, but FOXO was not a key regulatory gene of EE against damages in SM and HM. The mechanism was related to activity of Sirt1/FOXO/ SOD,CAT pathways and lipid catabolism in SM and HM.

## Acknowledgements

We thank the Core Facility of Drosophila Resource and Technology, Center for Excellence in Molecular Cell Science, Chinese Academy of Sciences, for providing fly stocks and reagents.

## Author Contributions

Research idea and study design: D.t.W.; data acquisition: D.t.W. X.K; data analysis/interpretation: D.t.W., Y.I.C; statistical analysis: D.t.W.; supervision: H.w.Q. Each author contributed during manuscript drafting or revision and approved the final version of the manuscript.

## Additional Information

Competing Interests: Authors have no conflicts of interest.

**Funding:** This work is supported by the Shandong Province Natural Science Foundation (No. ZR2020QC096) and the National Natural Science Foundation of China (No. 32000832).

## Associated Data

### Data Availability Statement

All the generated data and the analysis developed in this study are included in this article.

## References

1. Di Cesare M, Soric M, Bovet P, Miranda JJ, Bhutta Z, Stevens GA, et al. The epidemiological burden of obesity in childhood: a worldwide epidemic requiring urgent action. *Bmc Medicine*. 2019;17(1). doi: 10.1186/s12916-019-1449-8. PubMed PMID: WOS:000499929200001.
2. Kansra AR, Lakkunarajah S, Jay MS. Childhood and Adolescent Obesity: A Review. *Frontiers in Pediatrics*. 2021;8. doi: 10.3389/fped.2020.581461. PubMed PMID: WOS:000611504400001.
3. An RP, Shen J, Yang QY, Yang Y. Impact of built environment on physical activity and obesity among children and adolescents in China: A narrative systematic review. *Journal of Sport and Health Science*. 2019;8(2):153-69. doi: 10.1016/j.jshs.2018.11.003. PubMed PMID: WOS:000463361900009.
4. Gungor NK. Overweight and Obesity in Children and Adolescents. *Journal of Clinical Research in Pediatric Endocrinology*. 2014;6(3):129-43. doi: 10.4274/jcrpe.1471. PubMed PMID: WOS:000347784500001.
5. Ibrahim SH, Kohli R, Gores GJ. Mechanisms of Lipotoxicity in NAFLD and Clinical Implications. *Journal of Pediatric Gastroenterology and Nutrition*. 2011;53(2):131-40. doi: 10.1097/MPG.0b013e31822578db. PubMed PMID: WOS:000293129100004.
6. Petrovics P, Sandor B, Palfi A, Szekeres Z, Atlasz T, Toth K, et al. Association between Obesity and Overweight and Cardiorespiratory and Muscle Performance in Adolescents. *International Journal of Environmental Research and Public Health*. 2021;18(1). doi: 10.3390/ijerph18010134. PubMed PMID: WOS:000606222700001.
7. Rudrapatna S, Bhatt M, Wang K-W, Bierbrier R, Wang P-W, Banfield L, et al. Obesity and muscle-macrophage crosstalk in humans and mice: A systematic review. *Obesity Reviews*. 2019;20(11):1572-96. doi: 10.1111/obr.12922. PubMed PMID: WOS:000491476900005.
8. Bataweel EA, Ibrahim AI. Balance and musculoskeletal flexibility in children with obesity: a cross-sectional study. *Annals of Saudi Medicine*. 2020;40(2):120-5. doi: 10.5144/0256-4947.2020.120. PubMed PMID: WOS:000523556200006.
9. Nemet D. Childhood Obesity, Physical Activity, and Exercise. *Pediatric Exercise Science*. 2017;29(1):60-2. doi: 10.1123/pes.2017-0004. PubMed PMID: WOS:000397352200015.
10. McCoy SM, Rupp K. Physical activity participation, flourishing and academic engagement in adolescents with obesity. *Pediatric Obesity*. 2021;16(10). doi: 10.1111/ijpo.12796. PubMed PMID: WOS:000644655800001.
11. Lee S, Dong HH. FoxO integration of insulin signaling with glucose and lipid metabolism. *Journal of Endocrinology*. 2017;233(2):R67-R79. doi: 10.1530/joe-17-0002. PubMed PMID: WOS:000402383300001.
12. Birse RT, Choi J, Reardon K, Rodriguez J, Graham S, Diop S, et al. High-Fat-Diet-Induced Obesity and Heart Dysfunction Are Regulated by the TOR Pathway in *Drosophila*. *Cell Metabolism*. 2010;12(5):533-44. doi: 10.1016/j.cmet.2010.09.014. PubMed PMID: WOS:000283952300015.
13. Zhang J, Liu YJ, Jiang K, Jia JH. Hedgehog signaling promotes lipolysis in adipose tissue through directly regulating

- Bmm/ATGL lipase. *Developmental Biology*. 2020;457(1):128-39. doi: 10.1016/j.ydbio.2019.09.009. PubMed PMID: WOS:000502686100013.
14. Ye X, Li M, Hou T, Gao T, Zhu W-G, Yang Y. Sirtuins in glucose and lipid metabolism. *Oncotarget*. 2017;8(1):1845-59. doi: 10.18632/oncotarget.12157. PubMed PMID: MEDLINE:27659520.
15. Chang HC, Guarente L. SIRT1 and other sirtuins in metabolism. *Trends in Endocrinology and Metabolism*. 2014;25(3):138-45. doi: 10.1016/j.tem.2013.12.001. PubMed PMID: WOS:000333511900004.
16. Smith JS, Brachmann CB, Celic I, Kenna MA, Muhammad S, Starai VJ, et al. A phylogenetically conserved NAD<sup>+</sup>-dependent protein deacetylase activity in the Sir2 protein family. *Proceedings of the National Academy of Sciences of the United States of America*. 2000;97(12):6658-63. doi: 10.1073/pnas.97.12.6658. PubMed PMID: MEDLINE:10841563.
17. Wen D-T, Zheng L, Li J-X, Cheng D, Liu Y, Lu K, et al. Endurance exercise resistance to lipotoxic cardiomyopathy is associated with cardiac NAD(+)/dSIR2/PGC-1 alpha pathway activation in old *Drosophila*. *Biology Open*. 2019;8(10). doi: 10.1242/bio.044719. PubMed PMID: WOS:000494237800005.
18. Wen DT, Wang WQ, Hou WQ, Cai SX, Zhai SS. Endurance exercise protects aging *Drosophila* from high-salt diet (HSD)-induced climbing capacity decline and lifespan decrease by enhancing antioxidant capacity. *Biology Open*. 2020;9(5). doi: 10.1242/bio.045260. PubMed PMID: WOS:000539192700001.
19. Wen D-T, Zheng L, Li J-X, Lu K, Hou W-Q. The activation of cardiac dSir2-related pathways mediates physical exercise resistance to heart aging in old *Drosophila*. *Aging-U.S.* 2019;11(17):7274-93. doi: 10.18632/aging.102261. PubMed PMID: WOS:000487978100045.
20. Mas-Bargues C, Escriva C, Dromant M, Borrás C, Vina J. Lipid peroxidation as measured by chromatographic determination of malondialdehyde. Human plasma reference values in health and disease. *Archives of Biochemistry and Biophysics*. 2021;709. doi: 10.1016/j.abb.2021.108941. PubMed PMID: WOS:000720085500004.
21. Ayala A, Munoz MF, Arguelles S. Lipid Peroxidation: Production, Metabolism, and Signaling Mechanisms of Malondialdehyde and 4-Hydroxy-2-Nonenal. *Oxidative Medicine and Cellular Longevity*. 2014;2014. doi: 10.1155/2014/360438. PubMed PMID: WOS:000337428400001.
22. Seibert JT, Najt CP, Heden TD, Mashek DG, Chow LS. Muscle Lipid Droplets: Cellular Signaling to Exercise Physiology and Beyond. *Trends in Endocrinology and Metabolism*. 2020;31(12):928-38. doi: 10.1016/j.tem.2020.08.002. PubMed PMID: WOS:000594813600006.
23. Powers SK, Deminice R, Ozdemir M, Yoshihara T, Bomkamp MP, Hyatt H. Exercise-induced oxidative stress: Friend or foe? *Journal of Sport and Health Science*. 2020;9(5):415-25. doi: 10.1016/j.jshs.2020.04.001. PubMed PMID: WOS:000569026200005.
24. Muscella A, Stefano E, Marsigliante S. The effects of exercise training on lipid metabolism and coronary heart disease. *American Journal of Physiology-Heart and Circulatory Physiology*. 2020;319(1):H76-H88. doi: 10.1152/ajpheart.00708.2019. PubMed PMID: WOS:000551120200009.
25. Escalante Y, Saavedra JM, Garcia-Hermoso A, Dominguez AM. Improvement of the lipid profile with exercise in obese children: A systematic review. *Preventive Medicine*. 2012;54(5):293-301. doi: 10.1016/j.ypmed.2012.02.006. PubMed PMID: WOS:000304497800001.
26. Diaz-Jara E, Diaz HS, Rios-Gallardo A, Ortolani D, Andrade DC, Toledo C, et al. Exercise training reduces brainstem oxidative stress and restores normal breathing function in heart failure. *Free Radical Biology and Medicine*. 2021;172:470-81. doi: 10.1016/j.freeradbiomed.2021.06.032. PubMed PMID: WOS:000685094200005.
27. Ito T, Igaki T. Yorkie drives Ras-induced tumor progression by microRNA-mediated inhibition of cellular senescence. *Science Signaling*. 2021;14(685). doi: 10.1126/scisignal.aaz3578. PubMed PMID: WOS:000658258100001.
28. Achal M, Trujillo AS, Melkani GC, Farman GP, Ocorr K, Viswanathan MC, et al. A Restrictive Cardiomyopathy Mutation in an Invariant Proline at the Myosin Head/Rod Junction Enhances Head Flexibility and Function, Yielding Muscle Defects in *Drosophila*. *Journal of Molecular Biology*. 2016;428(11):2446-61. doi: 10.1016/j.jmb.2016.04.021. PubMed PMID: WOS:000377733200015.
29. Woodcock KJ, Kierdorf K, Pouchelon CA, Vivancos V, Dionne MS, Geissmann F. Macrophage-Derived upd3 Cytokine Causes Impaired Glucose Homeostasis and Reduced Lifespan in *Drosophila* Fed a Lipid-Rich Diet. *Immunity*. 2015;42(1):133-44. doi: 10.1016/j.immuni.2014.12.023. PubMed PMID: WOS:000348197500017.
30. Kayashima Y, Murata S, Sato M, Matsuura K, Asanuma T, Chimoto J, et al. Tea polyphenols ameliorate fat storage induced by high-fat diet in *Drosophila melanogaster*. *Biochemistry and biophysics reports*. 2015;4:417-24. doi:

10.1016/j.bbrep.2015.10.013. PubMed PMID: MEDLINE:29124233.

31. Tinkerhess MJ, Ginzberg S, Piazza N, Wessells RJ. Endurance Training Protocol and Longitudinal Performance Assays for *Drosophila melanogaster*. *Jove-Journal of Visualized Experiments*. 2012;(61). doi: 10.3791/3786. PubMed PMID: WOS:000209222800038.

32. Lowman KE, Wyatt BJ, Cunneely OP, Reed LK. The TreadWheel: Interval Training Protocol for Gently Induced Exercise in *Drosophila melanogaster*. *Jove-Journal of Visualized Experiments*. 2018;(136). doi: 10.3791/57788. PubMed PMID: WOS:000444752100113.

33. Sujkowski A, Wessells R. Using *Drosophila* to Understand Biochemical and Behavioral Responses to Exercise. *Exercise and Sport Sciences Reviews*. 2018;46(2):112-20. doi: 10.1249/jes.000000000000139. PubMed PMID: WOS:000428149500008.

34. Vogler G, Ocorr K. Visualizing the beating heart in *Drosophila*. *Journal of visualized experiments : JoVE*. 2009;(31). doi: 10.3791/1425. PubMed PMID: MEDLINE:19786947.

35. Fink M, Callol-Massot C, Chu A, Ruiz-Lozano P, Belmonte JCI, Giles W, et al. A new method for detection and quantification of heartbeat parameters in *Drosophila*, zebrafish, and embryonic mouse hearts. *Biotechniques*. 2009;46(2):101-+. doi: 10.2144/000113078. PubMed PMID: WOS:000266095700006.

36. Chaturvedi D, Reichert H, Gunage RD, VijayRaghavan K. Identification and functional characterization of muscle satellite cells in *Drosophila*. *Elife*. 2017;6. doi: 10.7554/eLife.30107. PubMed PMID: WOS:000414986500001.

37. Wen D-T, Zheng L, Yang F, Li H-Z, Hou W-Q. Endurance exercise prevents high-fat-diet induced heart and mobility premature aging and dsir2 expression decline in aging *Drosophila*. *Oncotarget*. 2018;9(7):7298-311. doi: 10.18632/oncotarget.23292. PubMed PMID: MEDLINE:29484111.

38. Watanabe LP, Riddle NC. New opportunities: *Drosophila* as a model system for exercise research. *Journal of Applied Physiology*. 2019;127(2):482-90. doi: 10.1152/jappphysiol.00394.2019. PubMed PMID: WOS:000482199900020.

39. Galikova M, Klepsatel P. Obesity and Aging in the *Drosophila* Model. *International Journal of Molecular Sciences*. 2018;19(7):24. doi: 10.3390/ijms19071896. PubMed PMID: WOS:000442807400075.

40. Guida MC, Birse RT, Dall'Agnese A, Toto PC, Diop SB, Mai A, et al. Intergenerational inheritance of high fat diet-induced cardiac lipotoxicity in *Drosophila*. *Nature Communications*. 2019;10. doi: 10.1038/s41467-018-08128-3. PubMed PMID: WOS:000455595400016.

41. Yu G, Hyun S. Proteostasis-associated aging: lessons from a *Drosophila* model. *Genes & Genomics*. 2021;43(1):1-9. doi: 10.1007/s13258-020-01012-9. PubMed PMID: WOS:000584620600001.

42. Na JB, Musselman LP, Pendse J, Baranski TJ, Bodmer R, Ocorr K, et al. A *Drosophila* Model of High Sugar Diet-Induced Cardiomyopathy. *Plos Genetics*. 2013;9(1):14. doi: 10.1371/journal.pgen.1003175. PubMed PMID: WOS:000314651500024.

43. Souidi A, Jagla K. *Drosophila* Heart as a Model for Cardiac Development and Diseases. *Cells*. 2021;10(11). doi: 10.3390/cells10113078. PubMed PMID: WOS:000723414600001.

44. Lee JY, Lee JH, Cheon CK. Functional Characterization of Gomisin N in High-Fat-Induced *Drosophila* Obesity Models. *International Journal of Molecular Sciences*. 2020;21(19). doi: 10.3390/ijms21197209. PubMed PMID: WOS:000586580900001.

45. Hoffmann J, Romey R, Fink C, Roeder T. *Drosophila* as a Model to Study Metabolic Disorders. *Yellow Biotechnology I: Insect Biotechnologie in Drug Discovery and Preclinical Research*. 2013;135:41-61. doi: 10.1007/10\_2013\_196. PubMed PMID: WOS:000332674000004.

46. Zheng L, Li QF, Ni L, Wang H, Ruan XC, Wu XS. Lifetime regular exercise affects the incident of different arrhythmias and improves organismal health in aging female *Drosophila melanogaster*. *Biogerontology*. 2017;18(1):97-108. doi: 10.1007/s10522-016-9665-5. PubMed PMID: WOS:000394151900007.

47. Zheng L, Feng Y, Wen DT, Wang H, Wu XS. Fatiguing exercise initiated later in life reduces incidence of fibrillation and improves sleep quality in *Drosophila*. *Age*. 2015;37(4). doi: 10.1007/s11357-015-9816-7. PubMed PMID: WOS:000360010300013.

48. Wen D-t, Zheng L, Ni L, Wang H, Feng Y, Zhang M. The expression of CG9940 affects the adaptation of cardiac function, mobility, and lifespan to exercise in aging *Drosophila*. *Experimental Gerontology*. 2016;83:6-14. doi: 10.1016/j.exger.2016.07.006. PubMed PMID: WOS:000382215600002.

49. Piazza N, Gosangi B, Devilla S, Arking R, Wessells R. Exercise-Training in Young *Drosophila melanogaster* Reduces Age-Related Decline in Mobility and Cardiac Performance. *Plos One*. 2009;4(6). doi: 10.1371/journal.pone.0005886. PubMed PMID: WOS:000207566400001.



50. Diop SB, Birse RT, Bodmer R. High Fat Diet Feeding and High Throughput Triacylglyceride Assay in *Drosophila Melanogaster*. *Jove-Journal of Visualized Experiments*. 2017;(127). doi: 10.3791/56029. PubMed PMID: WOS:000415370200046.
51. Tia N, Singh AK, Pandey P, Azad CS, Chaudhary P, Gambhir IS. Role of Forkhead Box O (FOXO) transcription factor in aging and diseases. *Gene*. 2018;648:97-105. doi: 10.1016/j.gene.2018.01.051. PubMed PMID: WOS:000426410200013.
52. Klotz LO. Redox regulation of FOXO transcription factors - relation to aging. *Zeitschrift Fur Gerontologie Und Geriatrie*. 2018;51:56-. PubMed PMID: WOS:000443583200175.
53. Blumrich A, Vogler G, Dresen S, Diop SB, Jaeger C, Leberer S, et al. Fat-body brummer lipase determines survival and cardiac function during starvation in *Drosophila melanogaster*. *Iscience*. 2021;24(4). doi: 10.1016/j.isci.2021.102288. PubMed PMID: WOS:000642261700039.
54. Diop SB, Bisharat-Kernizan J, Birse RT, Oldham S, Ocorr K, Bodmer R. PGC-1/Spargel Counteracts High-Fat-Diet-Induced Obesity and Cardiac Lipotoxicity Downstream of TOR and Brummer ATGL Lipase. *Cell Reports*. 2015;10(9):1572-84. doi: 10.1016/j.celrep.2015.02.022. PubMed PMID: WOS:000350740300014.
55. Wen D-T, Zheng L, Lu K, Hou W-Q. Activation of cardiac Nmnat/NAD(+)/SIRT2 pathways mediates endurance exercise resistance to lipotoxic cardiomyopathy in aging *Drosophila*. *Journal of Experimental Biology*. 2021;224(18). doi: 10.1242/jeb.242425. PubMed PMID: WOS:000703588500006.
56. Ding M, Zheng L, Li QF, Wang WL, Peng WD, Zhou M. Exercise-Training Regulates Apolipoprotein B in *Drosophila* to Improve HFD-Mediated Cardiac Function Damage and Low Exercise Capacity. *Frontiers in Physiology*. 2021;12. doi: 10.3389/fphys.2021.650959. PubMed PMID: WOS:000674998300001.
57. Webb AE, Brunet A. FOXO transcription factors: key regulators of cellular quality control. *Trends in Biochemical Sciences*. 2014;39(4):159-69. doi: 10.1016/j.tibs.2014.02.003. PubMed PMID: WOS:000335426200004.
58. Eijkelenboom A, Burgering BMT. FOXOs: signalling integrators for homeostasis maintenance. *Nature Reviews Molecular Cell Biology*. 2013;14(2):83-97. doi: 10.1038/nrm3507. PubMed PMID: WOS:000315074700009.
59. Klotz L-O, Sanchez-Ramos C, Prieto-Arroyo I, Urbanek P, Steinbrenner H, Monsalve M. Redox regulation of FoxO transcription factors. *Redox Biology*. 2015;6:51-72. doi: 10.1016/j.redox.2015.06.019. PubMed PMID: WOS:000367338700006.
60. Furukawa-Hibi Y, Kobayashi Y, Chen C, Motoyama N. FOXO transcription factors in cell-cycle regulation and the response to oxidative stress. *Antioxidants & Redox Signaling*. 2005;7(5-6):752-60. doi: 10.1089/ars.2005.7.752. PubMed PMID: WOS:000228594500025.
61. Hori YS, Kuno A, Hosoda R, Horio Y. Regulation of FOXOs and p53 by SIRT1 Modulators under Oxidative Stress. *Plos One*. 2013;8(9). doi: 10.1371/journal.pone.0073875. PubMed PMID: WOS:000326734500058.
62. Zhang T, Kraus WL. SIRT1-dependent regulation of chromatin and transcription: Linking NAD(+) metabolism and signaling to the control of cellular functions. *Biochimica Et Biophysica Acta-Proteins and Proteomics*. 2010;1804(8):1666-75. doi: 10.1016/j.bbapap.2009.10.022. PubMed PMID: WOS:000279571200013.
63. Yaman D, Takmaz T, Yuksel N, Dincer SA, Sahin FI. Evaluation of silent information regulator T (SIRT) 1 and Forkhead Box O (FOXO) transcription factor 1 and 3a genes in glaucoma. *Molecular Biology Reports*. 2020;47(12):9337-44. doi: 10.1007/s11033-020-05994-3. PubMed PMID: WOS:000590048100003.
64. Kops GJPL, Dansen TB, Polderman PE, Saarloos I, Wirtz KWA, Coffey PJ, et al. Forkhead transcription factor FOXO3a protects quiescent cells from oxidative stress. *Nature*. 2002;419(6904):316-21. doi: 10.1038/nature01036. PubMed PMID: MEDLINE:12239572.
65. Thongnak L, Pongchaidecha A, Lungkaphin A. Renal Lipid Metabolism and Lipotoxicity in Diabetes. *American Journal of the Medical Sciences*. 2020;359(2):84-99. doi: 10.1016/j.amjms.2019.11.004. PubMed PMID: WOS:000508635700009.
66. Wende AR, Abel ED. Lipotoxicity in the heart. *Biochimica Et Biophysica Acta-Molecular and Cell Biology of Lipids*. 2010;1801(3):311-9. doi: 10.1016/j.bbalip.2009.09.023. PubMed PMID: WOS:000275563300015.
67. Nishi H, Higashihara T, Inagi R. Lipotoxicity in Kidney, Heart, and Skeletal Muscle Dysfunction. *Nutrients*. 2019;11(7). doi: 10.3390/nu11071664. PubMed PMID: WOS:000478885400185.
68. Drosatos K. Fatty old hearts: role of cardiac lipotoxicity in age-related cardiomyopathy. *Pathobiology of Aging and Age-Related Diseases*. 2016;6:8. doi: 10.3402/pba.v6.32221. PubMed PMID: WOS:000389258900001.
69. Shvets VN, Davydov VV. State of induced lipid peroxidation in the heart of mature and aged rats under stress. *Ukrainskii biokhimicheskii zhurnal (1978)*. 1993;65(6):91-6. PubMed PMID: MEDLINE:8048187.
70. Boehm D, Krzystek-Korpacka M, Neubauer K, Matusiewicz M, Paradowski L, Gamian A. Lipid peroxidation markers in

- Crohn's disease: the associations and diagnostic value. *Clinical Chemistry and Laboratory Medicine*. 2012;50(8):1359-66. doi: 10.1515/cclm-2011-0817. PubMed PMID: WOS:000309200500011.
71. Jalabert A, Grand A, Steghens JP, Barbotte E, Pigue C, Picaud JC. Lipid peroxidation in all-in-one admixtures for preterm neonates: impact of amount of lipid, type of lipid emulsion and delivery condition. *Acta Paediatrica*. 2011;100(9):1200-5. doi: 10.1111/j.1651-2227.2011.02269.x. PubMed PMID: WOS:000293942500018.
72. Gronke S, Mildner A, Fellert S, Tennagels N, Petry S, Muller G, et al. Brummer lipase is an evolutionary conserved fat storage regulator in *Drosophila*. *Cell Metabolism*. 2005;1(5):323-30. doi: 10.1016/j.cmet.2005.04.003. PubMed PMID: WOS:000229358800007.
73. Nazario-Yepiz NO, Sobaberas JF, Lyman R, Campbell MR, Shankar V, Anholt RRH, et al. Physiological and metabolomic consequences of reduced expression of the *Drosophila* brummer triglyceride Lipase. *Plos One*. 2021;16(9). doi: 10.1371/journal.pone.0255198. PubMed PMID: WOS:000746527400004.
74. Bank WJ, DiMauro S, Bonilla E, Capuzzi DM, Rowland LP. A disorder of muscle lipid metabolism and myoglobinuria. Absence of carnitine palmitoyl transferase. *The New England journal of medicine*. 1975;292(9):443-9. doi: 10.1056/nejm197502272920902. PubMed PMID: MEDLINE:123038.
75. Rigante D, Bersani G, Compagnone A, Zampetti A, De Nisco A, Sacco E, et al. Exercise-induced rhabdomyolysis and transient loss of deambulation as outset of partial carnitine palmitoyl transferase II deficiency. *Rheumatology International*. 2011;31(6):805-7. doi: 10.1007/s00296-009-1221-z. PubMed PMID: WOS:000290989300017.
76. Liu S, Wu HJ, Zhang ZQ, Chen Q, Liu B, Wu JP, et al. L-carnitine ameliorates cancer cachexia in mice by regulating the expression and activity of carnitine palmitoyl transferase. *Cancer Biology & Therapy*. 2011;12(2):125-30. doi: 10.4161/cbt.12.2.15717. PubMed PMID: WOS:000292842700005.
77. Noland RC. Exercise and Regulation of Lipid Metabolism. *Molecular and Cellular Regulation of Adaptation to Exercise*. 2015;135:39-74. doi: 10.1016/bs.pmbts.2015.06.017. PubMed PMID: WOS:000385015700004.
78. Horowitz JF, Klein S. Lipid metabolism during endurance exercise. *American Journal of Clinical Nutrition*. 2000;72(2):558S-63S. PubMed PMID: WOS:000088634200011.
79. Spirlandeli AL, Deminice R, Jordao AA. Plasma Malondialdehyde as Biomarker of Lipid Peroxidation: Effects of Acute Exercise. *International Journal of Sports Medicine*. 2014;35(1):14-8. doi: 10.1055/s-0033-1345132. PubMed PMID: WOS:000329430000003.
80. Jabbour G, Iancu HD. Acute and chronic exercises: Effect on lipid metabolisms in obese individuals. *Science & Sports*. 2017;32(6):321-6. doi: 10.1016/j.scispo.2017.01.010. PubMed PMID: WOS:000422896200001.
81. Wei P, Guo JH, Xue W, Zhao Y, Yang JB, Wang JW. RNF34 modulates the mitochondrial biogenesis and exercise capacity in muscle and lipid metabolism through ubiquitination of PGC-1 in *Drosophila*. *Acta Biochimica Et Biophysica Sinica*. 2018;50(10):1038-46. doi: 10.1093/abbs/gmy106. PubMed PMID: WOS:000448771600011.

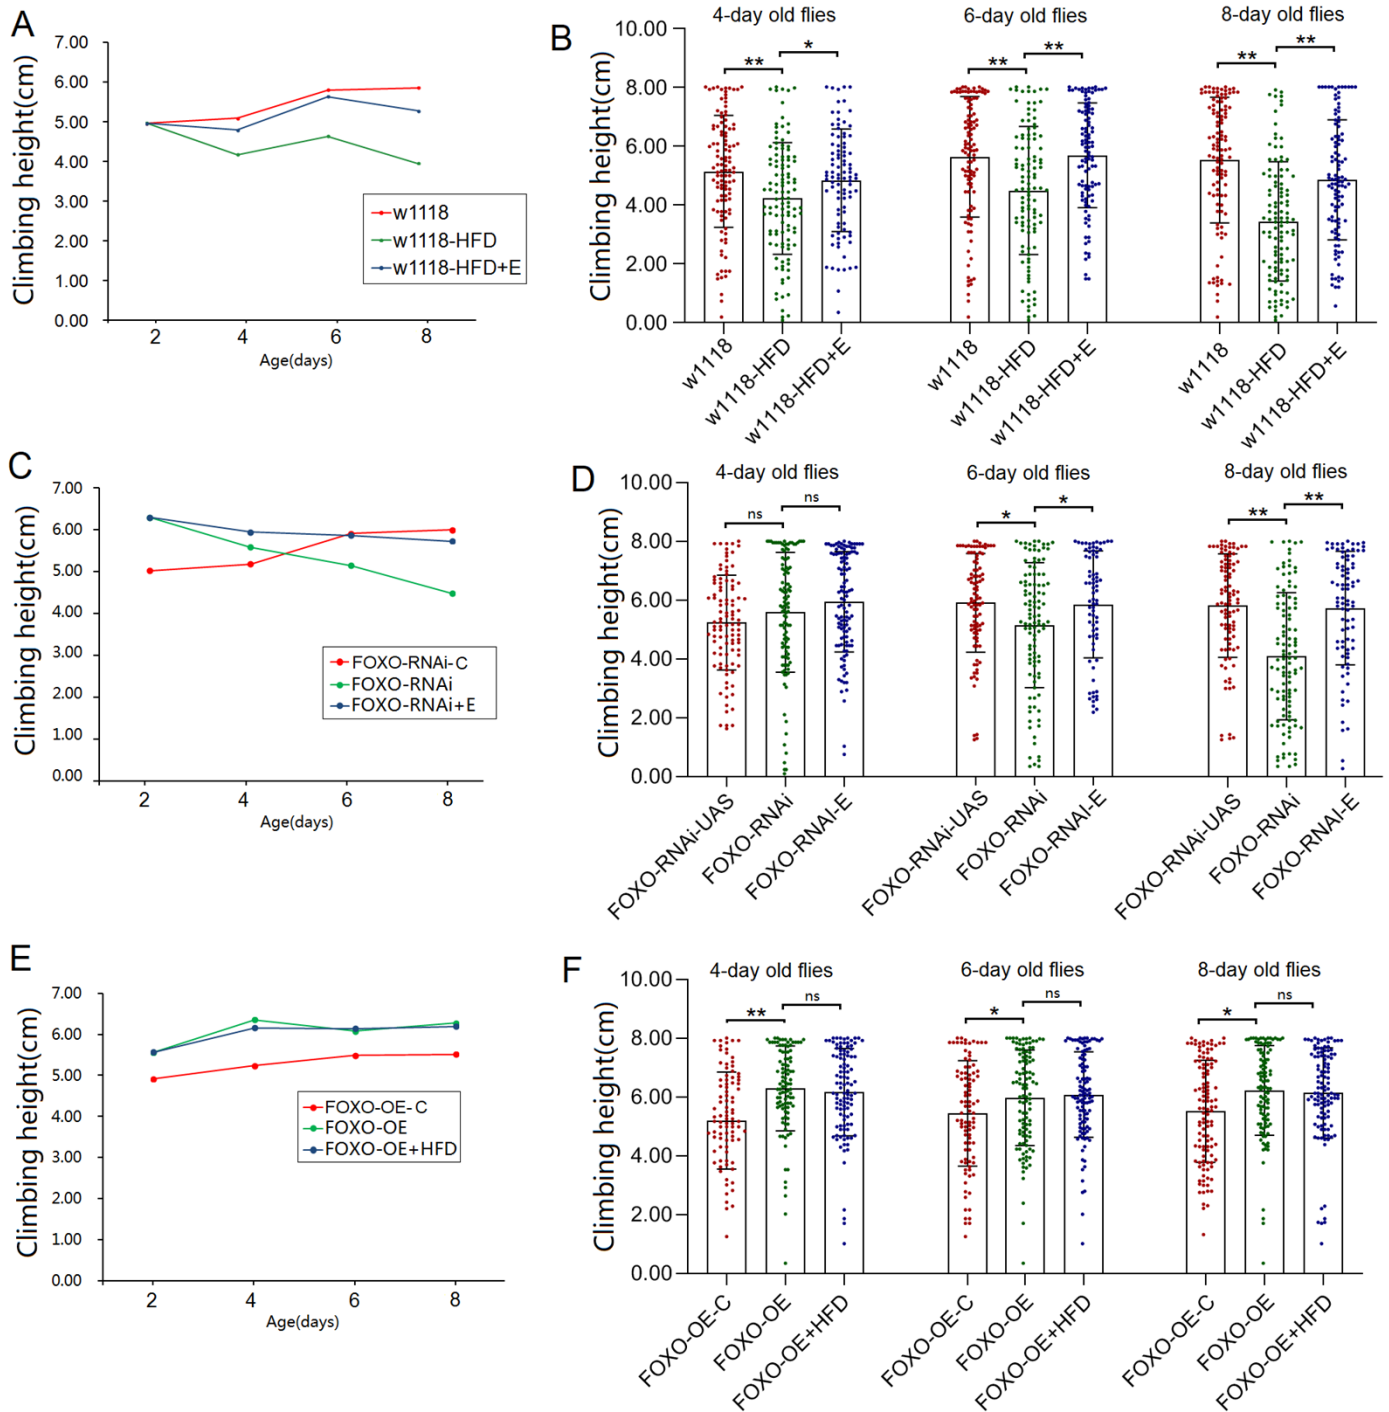

**Fig.1** The climbing height in 3 seconds of flies. **(A)** Curve of climbing height(CH) in *w<sup>1118</sup>* flies over 5 days. During those five days, the CH increased gradually, but a HFD caused the CH to decrease gradually, and exercise improved the CH reduction induced by a high-fat diet. **(B)** Comparison of CH in the same age group of *w<sup>1118</sup>* flies. **(C)** Curve of CH in FOXO-RNAi flies over 5 days. During those five days, the CH increased gradually in FOXO-RNAi-UAS flies, but FSR caused the CH to decrease gradually, and exercise improved the climbing height reduction induced by FSR. **(D)** Comparison of CH in the same age group of FOXO-RNAi-UAS flies and FOXO-RNAi flies. **(E)** Curve of CH in FOXO-OE flies over 5 days. During those five days, the CH increased gradually in FOXO-OE-UAS flies and FOXO-OE flies, and HFD does not reduce CH in FOXO-OE flies. **(F)** Comparison of CH in the same age group of FOXO-OE-UAS flies and FOXO-OE flies. For CH measurement, the sample size was 100-120 flies for each group, and the 1-way analysis of variance (ANOVA) with least significant difference (LSD) tests was used to identify differences among the groups at the same age. Data are represented as means  $\pm$  SEM. \* $P < 0.05$ ; \*\* $P < 0.01$ .

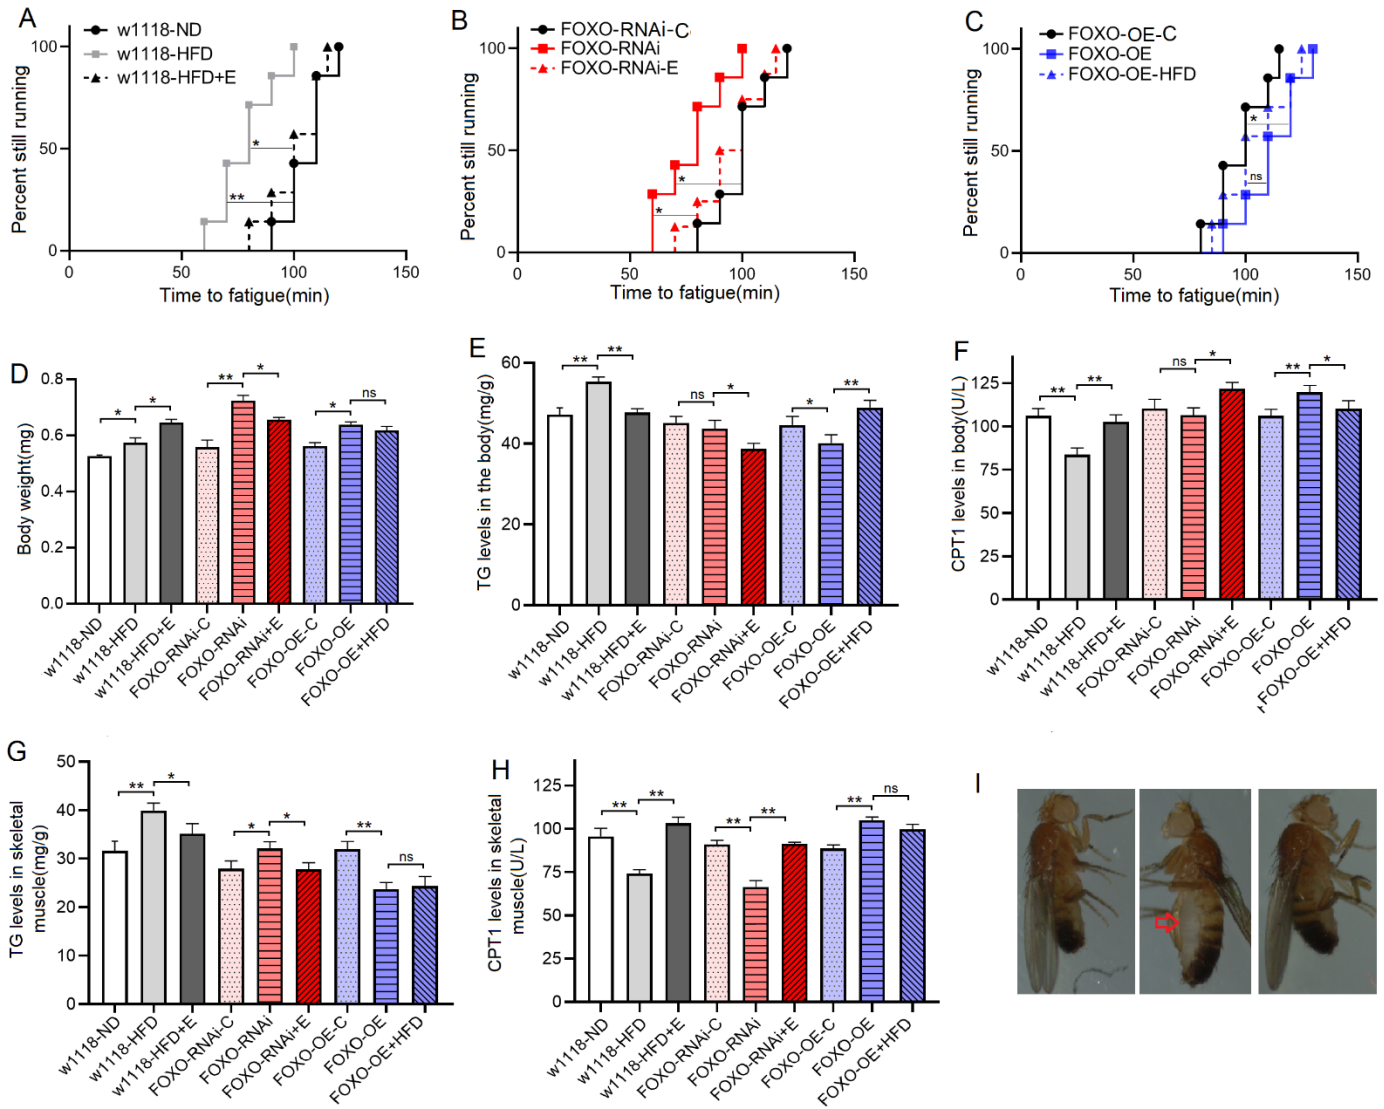

**Fig.2** The climbing endurance and lipid metabolism of 8-day old flies. **(A)** Time to fatigue(TTF) in  $w^{1118}$  flies. **(B)** TTF in FOXO-RNAi flies. **(C)** TTF in FOXO-OE flies. **(D)** The body weight. **(E)** The body TG level. **(F)** The body CPT1 protein level. **(F)** The muscle TG level. **(F)** The muscle CPT1 protein level. **(F)** The images of  $w^{1118}$  flies. Red clipping indicated obvious lipid accumulation in abdomen induced by HFD. For climbing endurance, the sample size was 200-220 flies for each group, and P-values for climbing endurance curves were calculated by the log-rank test. For TG and CPT1 measurement, the sample size was about 20 flies' skeletal muscle for each group, and the 1-way analysis of variance (ANOVA) with least significant difference (LSD) tests was used to identify differences among the groups with similar genetic backgrounds. Measurements were taken 3 times. Data are represented as means  $\pm$  SEM. \* $P < 0.05$ ; \*\* $P < 0.01$ .



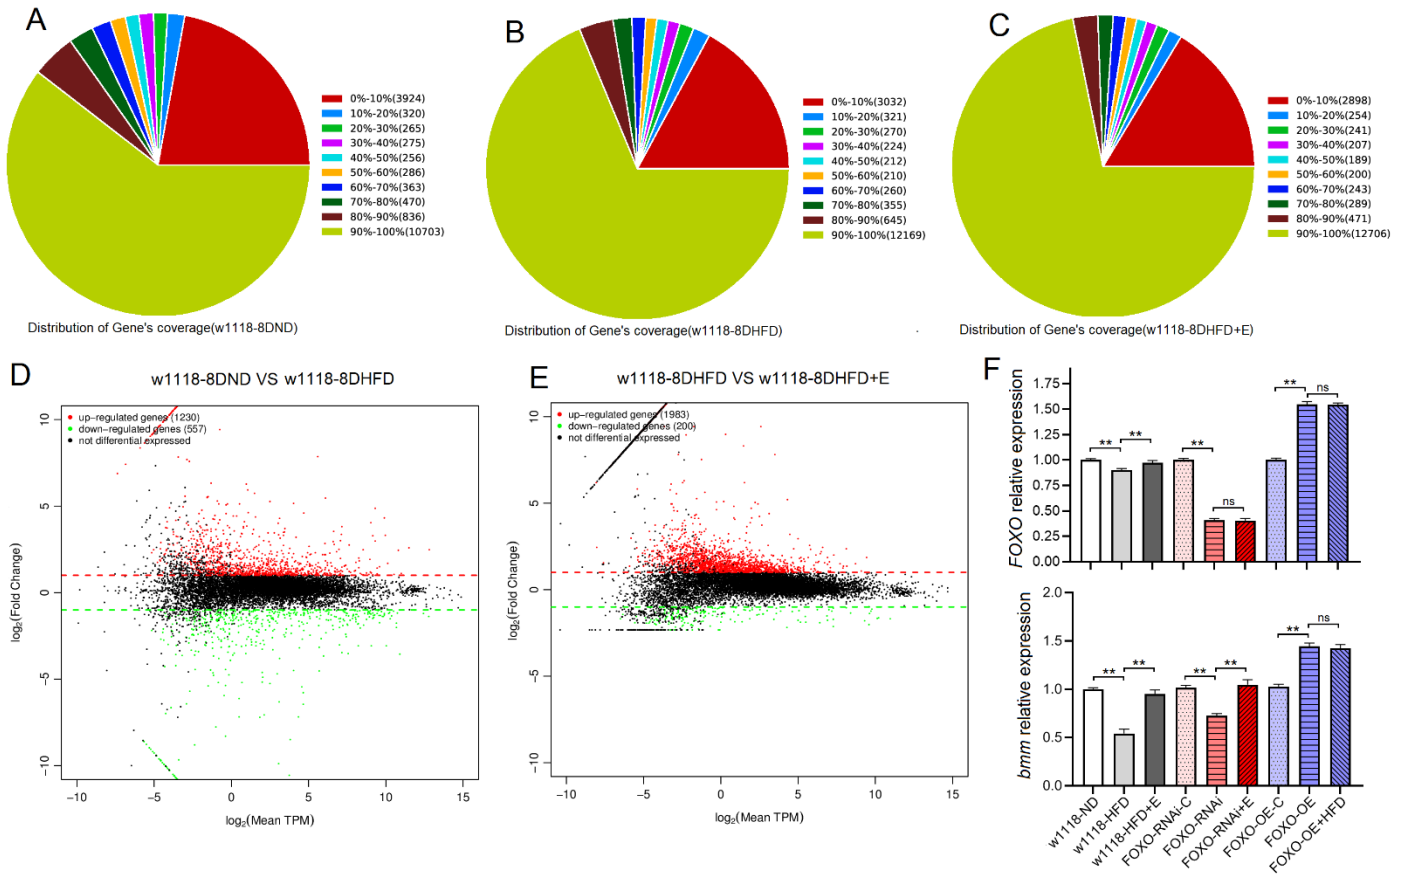

**Fig.3** High-throughput sequencing and RT-PCR results of skeletal muscle of *Drosophila*  $w^{1118}$ . **(A)** Distribution of gene's coverage in  $w^{1118}$  flies. **(B)** Distribution of gene's coverage in  $w^{1118}$ -HFD flies. **(C)** Distribution of gene's coverage in  $w^{1118}$ -HFD+E flies. **(D)** Changes in gene expression in skeletal muscle w1118 compared with w1118-HFD. **(E)** Changes in gene expression in skeletal muscle w1118-HFD compared with w1118-HFD+E. **(F)** The expression of *FOXO* gene and *bmm* gene in skeletal muscle. High-throughput sequencing results showed that HFD significantly down-regulated the expression of *FOXO* gene and *bmm* gene, and exercise significantly upregulated *FOXO* gene and *bmm* gene. qRT-PCR results further confirmed the results of high throughput sequencing. For High-throughput sequencing and RT-PCR measurement, the sample size was about 30 flies' skeletal muscle for each group, and the 1-way analysis of variance (ANOVA) with least significant difference (LSD) tests was used to identify differences among the groups with similar genetic backgrounds. Measurements were taken 3 times. Data are represented as means  $\pm$  SEM. \* $P < 0.05$ ; \*\* $P < 0.01$ .

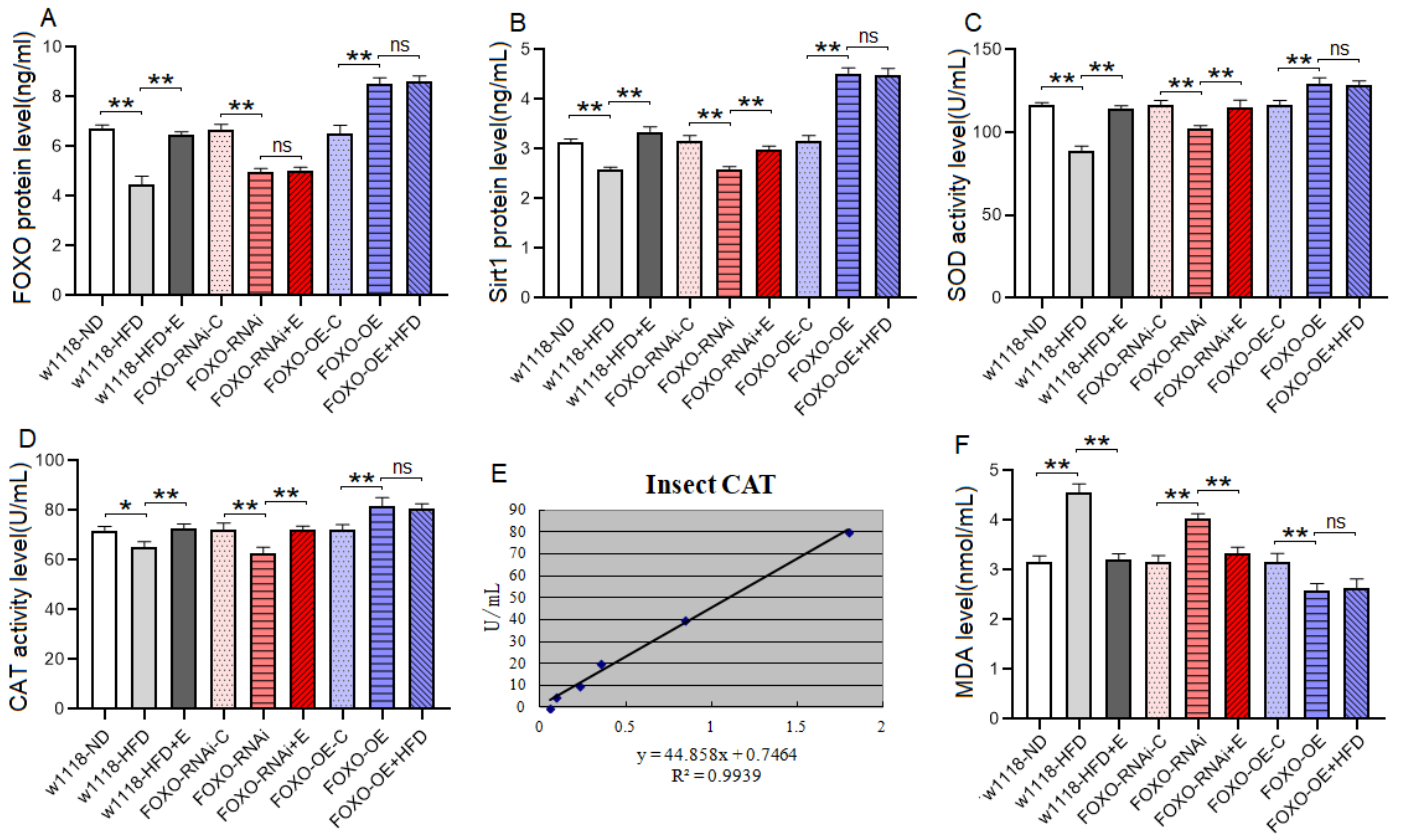

**Fig.4** The Sirt1/FOXO pathways activity and lipotoxicity in skeletal muscle. (A) FOXO protein level. (B) Sirt1 protein level. (C) SOD protein activity level. (D) CAT protein activity level. (E) Standard curve of CAT test. (F) MDA level. For protein and MDA measurement, the sample size was about 20 flies' skeletal muscle for each group, and the 1-way analysis of variance (ANOVA) with least significant difference (LSD) tests was used to identify differences among the groups with similar genetic backgrounds. Measurements were taken 3 times. Data are represented as means  $\pm$  SEM. \* $P < 0.05$ ; \*\* $P < 0.01$ .

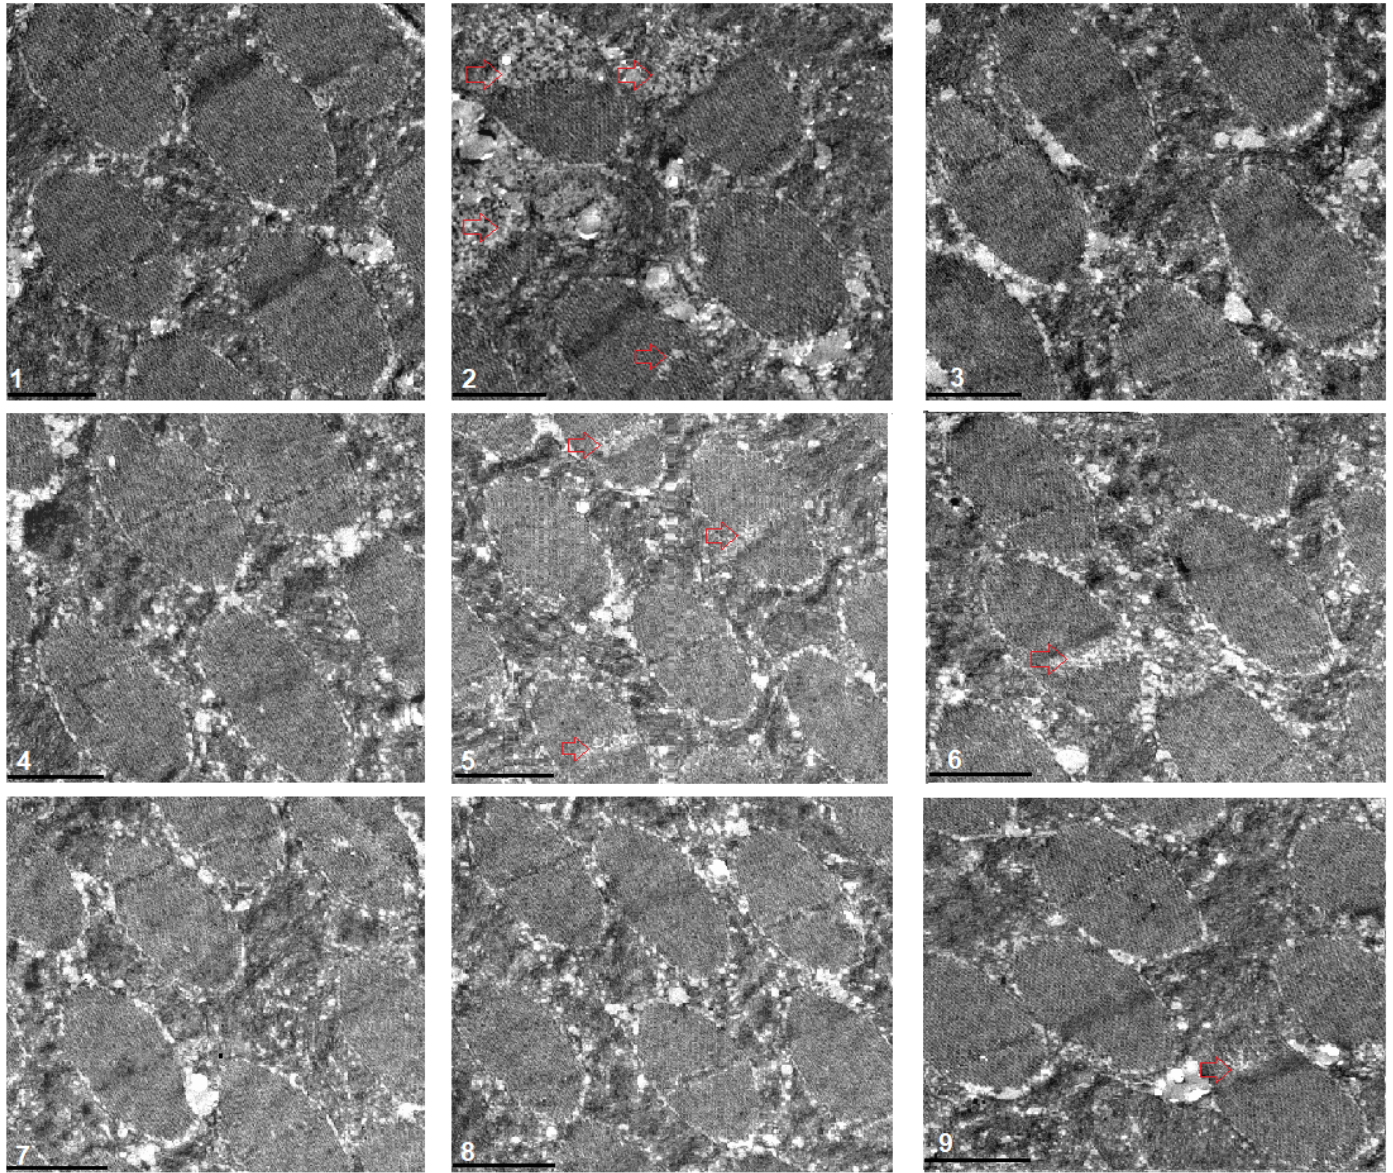

**Fig.5** Transmission electron microscopy of muscle. 1:  $w^{1118}$  flies; 2:  $w^{1118}$ -HFD flies; 3:  $w^{1118}$ -HFD+E flies; 4: FOXO-RNAi-UAS flies; 5: FOXO-RNAi flies; 6: FOXO-RNAi+E flies; 7: FOXO-OE-UAS flies; 8: FOXO-OE flies; 9: FOXO-OE+HFD flies. Scale: the black line represents 2 microns. The transmission electron microscope images displayed that HFD and FSR induced myofibrillary damage, but PE could improve the myofibrillary damage induced by HFD and FSR. FSO protected myofibrillary from damage induced by HFD.



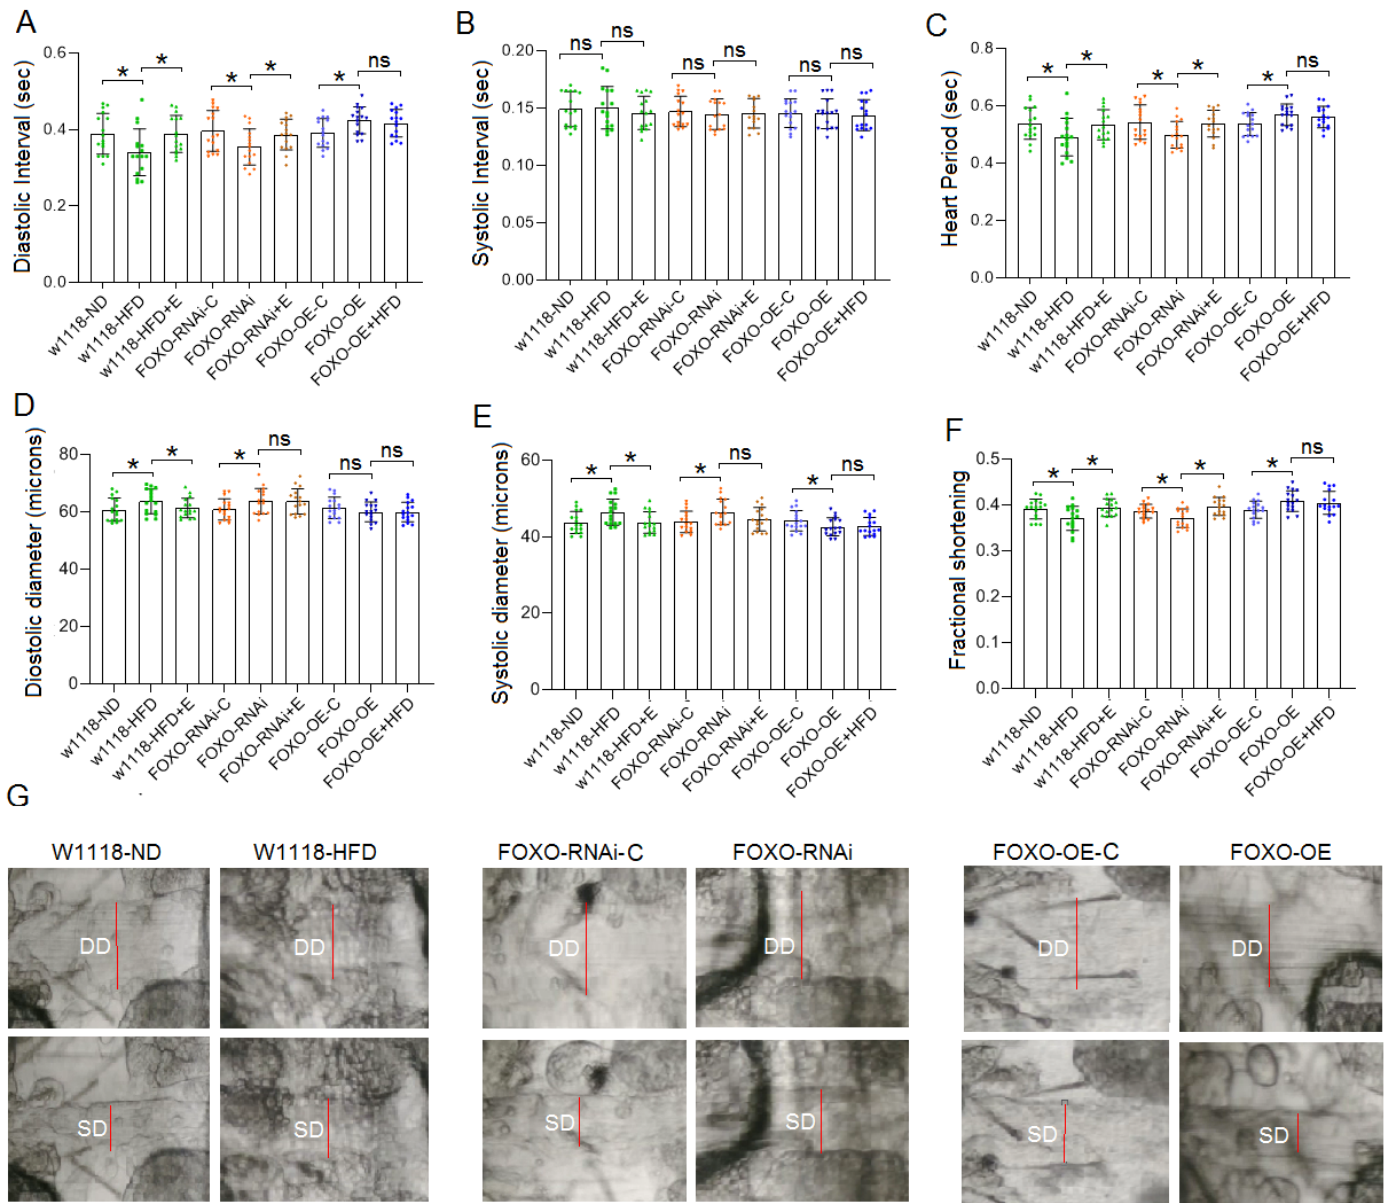

**Fig.6** Heart function in 8-day old flies. (A) Heart diastolic period. (B) Heart systolic period. (C) Heart period. (D) Diastolic diameter. (E) Systolic diameter. (F) Fractional shortening. (J) Systolic image and diastolic image of flies. SD: systolic diameter; DD: diastolic diameter. For heart function, sample size was 17 hearts for each group, and the 1-way analysis of variance (ANOVA) with least significant difference (LSD) tests was used to identify differences among the groups with similar genetic backgrounds. Data are represented as means  $\pm$  SEM. \* $P < 0.05$ ; \*\* $P < 0.01$ .



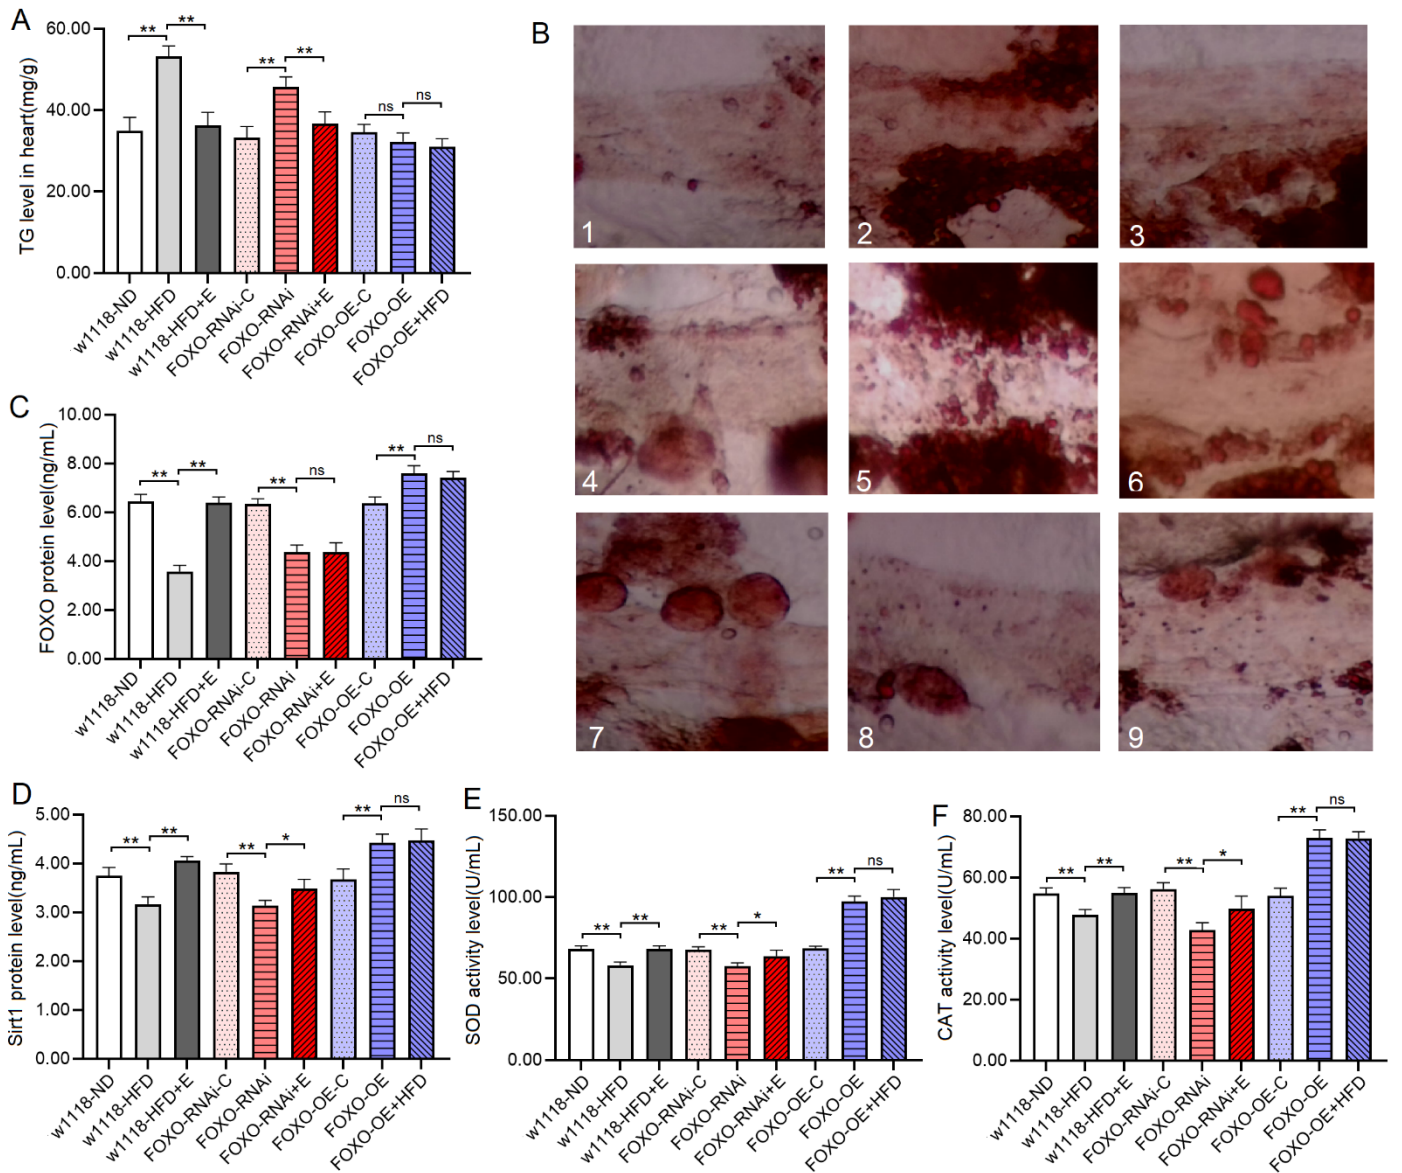

**Fig.7** Heart TG level and heart Sirt1/FOXO pathways activity in 8-day old flies. (A) Heart TG level. (B) Oil red O staining of the heart of *Drosophila*. 1: w<sup>1118</sup> flies; 2: w<sup>1118</sup>-HFD flies; 3: w<sup>1118</sup>-HFD+E flies; 4: FOXO-RNAi-UAS flies; 5: FOXO-RNAi flies; 6: FOXO-RNAi+E flies; 7: FOXO-OE-UAS flies; 8: FOXO-OE flies; 9: FOXO-OE+HFD flies. (C) Heart FOXO protein level. (D) Heart Sirt1 protein level. (E) Heart SOD activity level. (F) Heart CAT activity level. For protein measurement, the sample size was about 60 flies' hearts for each group, and the 1-way analysis of variance (ANOVA) with least significant difference (LSD) tests was used to identify differences among the groups with similar genetic backgrounds. Measurements were taken 3 times. Data are represented as means  $\pm$  SEM. \*P<0.05; \*\*P<0.01.

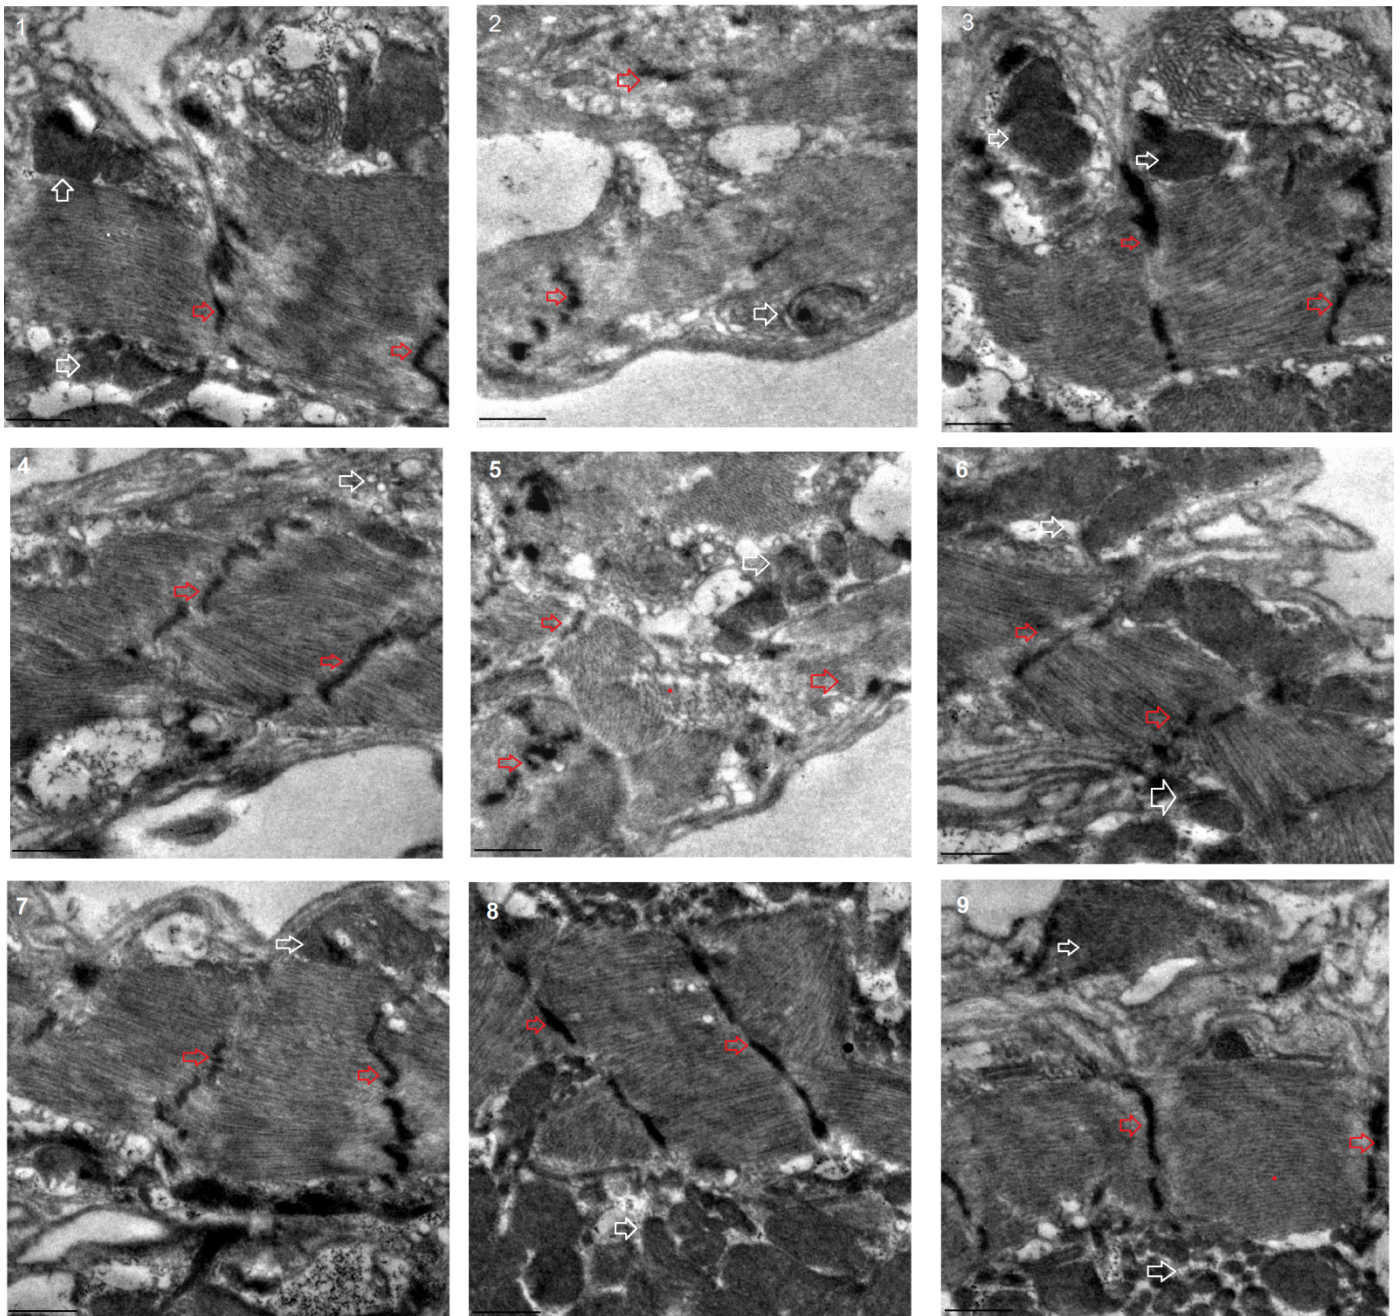

**Fig.8** Transmission electron microscopy of heart. 1:  $w^{1118}$  flies; 2:  $w^{1118}$ -HFD flies; 3:  $w^{1118}$ -HFD+E flies; 4: FOXO-RNAi-UAS flies; 5: FOXO-RNAi flies; 6: FOXO-RNAi+E flies; 7: FOXO-OE-UAS flies; 8: FOXO-OE flies; 9: FOXO-OE+HFD flies. Scale: the black line represents 2 microns. The red arrow points to the Z line. The white arrow points to the mitochondria. The transmission electron microscope images displayed that HFD and FSR induced myofibrillary damage and mitochondrial damage, but PE could improve the myofibrillary damage and mitochondrial damage induced by HFD and FSR. FSO protected myofibrillary and mitochondrial from damage induced by HFD.
